# Supplementary material
Source: publisher figshare collection journal article supplement (https://acs.figshare.com/ndownloader/files/3969826)
Supplement: Supplementary file 1 [file 3969826]

 
data_FormI 
 
_audit_creation_method            SHELXL-97 
_chemical_name_systematic 
; 
 ? 
; 
_chemical_name_common             ? 
_chemical_melting_point           ? 
_chemical_formula_moiety          'C18 H12 Cu N2 O2, C12 H4 N4' 
_chemical_formula_sum 
 'C30 H16 Cu N6 O2' 
_chemical_formula_weight          556.03 
 
loop_ 
 _atom_type_symbol 
 _atom_type_description 
 _atom_type_scat_dispersion_real 
 _atom_type_scat_dispersion_imag 
 _atom_type_scat_source 
 'C'  'C'   0.0033   0.0016 
 'International Tables Vol C Tables 4.2.6.8 and 6.1.1.4' 
 'H'  'H'   0.0000   0.0000 
 'International Tables Vol C Tables 4.2.6.8 and 6.1.1.4' 
 'N'  'N'   0.0061   0.0033 
 'International Tables Vol C Tables 4.2.6.8 and 6.1.1.4' 
 'O'  'O'   0.0106   0.0060 
 'International Tables Vol C Tables 4.2.6.8 and 6.1.1.4' 
 'Cu'  'Cu'   0.3201   1.2651 
 'International Tables Vol C Tables 4.2.6.8 and 6.1.1.4' 
 
_symmetry_cell_setting           'Triclinic'
_symmetry_space_group_name_H-M   'P-1   '
_symmetry_space_group_name_Hall  '-P 1'
 
 
loop_ 
 _symmetry_equiv_pos_as_xyz 
 'x, y, z' 
 '-x, -y, -z' 
 
_cell_length_a                    7.127(5) 
_cell_length_b                    7.543(5) 
_cell_length_c                    12.014(5) 
_cell_angle_alpha                 83.495(5) 
_cell_angle_beta                  88.783(5) 
_cell_angle_gamma                 67.724(5) 
_cell_volume                      593.6(6) 
_cell_formula_units_Z             1 
_cell_measurement_temperature     298(2) 
_cell_measurement_reflns_used    3686
_cell_measurement_theta_min        2.94
_cell_measurement_theta_max       27.51
 
_exptl_crystal_description       'plate'
_exptl_crystal_colour            'black'
_exptl_crystal_size_max           0.50 
_exptl_crystal_size_mid           0.34 
_exptl_crystal_size_min           0.05 
_exptl_crystal_density_meas       ? 
_exptl_crystal_density_diffrn     1.555 
_exptl_crystal_density_method     'not measured' 
_exptl_crystal_F_000              283 
_exptl_absorpt_coefficient_mu     0.963 
_exptl_absorpt_correction_type    'multi-scan'
_exptl_absorpt_correction_T_min   0.6445 
_exptl_absorpt_correction_T_max   0.9534 
_exptl_absorpt_process_details    'APEX2 Software Suite (Bruker,2009)'  
 
_exptl_special_details 
; 
 ? 
; 
 
_diffrn_ambient_temperature       298(2) 
_diffrn_radiation_wavelength      0.71073 
_diffrn_radiation_type            MoK\a 
_diffrn_radiation_source          'fine-focus sealed tube' 
_diffrn_radiation_monochromator   graphite 
_diffrn_measurement_device_type  'Bruker APEX-II CCD'
_diffrn_measurement_method       '\f and \w scans'
_diffrn_detector_area_resol_mean  ? 
_diffrn_reflns_number             7020 
_diffrn_reflns_av_R_equivalents   0.0215 
_diffrn_reflns_av_sigmaI/netI     0.0244 
_diffrn_reflns_limit_h_min        -9 
_diffrn_reflns_limit_h_max        9 
_diffrn_reflns_limit_k_min        -9 
_diffrn_reflns_limit_k_max        9 
_diffrn_reflns_limit_l_min        -15 
_diffrn_reflns_limit_l_max        15 
_diffrn_reflns_theta_min          1.71 
_diffrn_reflns_theta_max          27.50 
_reflns_number_total              2698 
_reflns_number_gt                 2571 
_reflns_threshold_expression      >2sigma(I) 
 
_computing_data_collection      'Bruker APEX2'
_computing_cell_refinement      'Bruker SAINT'
_computing_data_reduction       'Bruker SAINT'  
_computing_structure_solution   'SHELXS-97 (Sheldrick, 2008)'
_computing_structure_refinement 'SHELXL-97 (Sheldrick, 2008)'
_computing_molecular_graphics   'Bruker SHELXTL'
_computing_publication_material 'Bruker SHELXTL'
 
_refine_special_details 
; 
 Refinement of F^2^ against ALL reflections.  The weighted R-factor wR and 
 goodness of fit S are based on F^2^, conventional R-factors R are based 
 on F, with F set to zero for negative F^2^. The threshold expression of 
 F^2^ > 2sigma(F^2^) is used only for calculating R-factors(gt) etc. and is 
 not relevant to the choice of reflections for refinement.  R-factors based 
 on F^2^ are statistically about twice as large as those based on F, and R- 
 factors based on ALL data will be even larger. 
; 
 
_refine_ls_structure_factor_coef  Fsqd  
_refine_ls_matrix_type            full 
_refine_ls_weighting_scheme       calc  
_refine_ls_weighting_details 
 'calc w=1/[\s^2^(Fo^2^)+(0.0420P)^2^+0.1530P] where P=(Fo^2^+2Fc^2^)/3' 
_atom_sites_solution_primary      direct 
_atom_sites_solution_secondary    difmap 
_atom_sites_solution_hydrogens    geom 
_refine_ls_hydrogen_treatment     mixed 
_refine_ls_extinction_method      none 
_refine_ls_extinction_coef        ? 
_refine_ls_number_reflns          2698 
_refine_ls_number_parameters      206 
_refine_ls_number_restraints      0 
_refine_ls_R_factor_all           0.0301 
_refine_ls_R_factor_gt            0.0285 
_refine_ls_wR_factor_ref          0.0785 
_refine_ls_wR_factor_gt           0.0776 
_refine_ls_goodness_of_fit_ref    1.091 
_refine_ls_restrained_S_all       1.091 
_refine_ls_shift/su_max           0.000 
_refine_ls_shift/su_mean          0.000 
 
loop_ 
 _atom_site_label 
 _atom_site_type_symbol 
 _atom_site_fract_x 
 _atom_site_fract_y 
 _atom_site_fract_z 
 _atom_site_U_iso_or_equiv 
 _atom_site_adp_type 
 _atom_site_occupancy 
 _atom_site_symmetry_multiplicity 
 _atom_site_calc_flag 
 _atom_site_refinement_flags 
 _atom_site_disorder_assembly 
 _atom_site_disorder_group 
Cu1 Cu 1.0000 1.0000 1.0000 0.03055(11) Uani 1 2 d S . . 
O2 O 1.01915(18) 0.76704(16) 0.94027(11) 0.0406(3) Uani 1 1 d . . . 
N1 N 0.72657(19) 1.10563(18) 0.93345(11) 0.0278(3) Uani 1 1 d . . . 
C4 C 0.4989(2) 1.0098(2) 0.83014(13) 0.0300(3) Uani 1 1 d . . . 
C9 C 0.6862(2) 0.9708(2) 0.88355(12) 0.0269(3) Uani 1 1 d . . . 
C8 C 0.8503(2) 0.7863(2) 0.88900(13) 0.0307(3) Uani 1 1 d . . . 
C1 C 0.5862(2) 1.2815(2) 0.93175(14) 0.0325(3) Uani 1 1 d . . . 
N3 N 0.9211(3) 1.2138(3) 0.69486(17) 0.0599(5) Uani 1 1 d . . . 
C6 C 0.6289(3) 0.6827(2) 0.78646(15) 0.0364(4) Uani 1 1 d . . . 
C10 C 0.4834(3) 0.8464(2) 0.44978(14) 0.0356(4) Uani 1 1 d . . . 
H10 H 0.4707 0.7466 0.4157 0.043 Uiso 1 1 calc R . . 
C11 C 0.6572(3) 0.8173(3) 0.50418(15) 0.0365(4) Uani 1 1 d . . . 
C3 C 0.3525(3) 1.1996(3) 0.82988(15) 0.0369(4) Uani 1 1 d . . . 
C13 C 0.8646(3) 0.9407(3) 0.60849(14) 0.0358(4) Uani 1 1 d . . . 
N2 N 1.1782(3) 0.6240(3) 0.61174(17) 0.0609(5) Uani 1 1 d . . . 
C7 C 0.8161(3) 0.6440(2) 0.83943(15) 0.0360(4) Uani 1 1 d . . . 
C14 C 1.0377(3) 0.7618(3) 0.61196(15) 0.0417(4) Uani 1 1 d . . . 
C12 C 0.6839(3) 0.9690(2) 0.55640(14) 0.0335(3) Uani 1 1 d . . . 
C15 C 0.8954(3) 1.0915(3) 0.65792(15) 0.0417(4) Uani 1 1 d . . . 
C5 C 0.4724(3) 0.8590(3) 0.78092(14) 0.0353(4) Uani 1 1 d . . . 
C2 C 0.3958(3) 1.3334(3) 0.88025(16) 0.0383(4) Uani 1 1 d . . . 
H1 H 0.623(3) 1.369(3) 0.9667(15) 0.035(5) Uiso 1 1 d . . . 
H6 H 0.613(3) 0.586(3) 0.7524(17) 0.043(5) Uiso 1 1 d . . . 
H2 H 0.308(3) 1.450(3) 0.8788(17) 0.044(6) Uiso 1 1 d . . . 
H7 H 0.915(3) 0.526(3) 0.8424(16) 0.038(5) Uiso 1 1 d . . . 
H5 H 0.353(3) 0.886(3) 0.7486(16) 0.041(5) Uiso 1 1 d . . . 
H3 H 0.236(3) 1.233(3) 0.7981(17) 0.043(5) Uiso 1 1 d . . . 
H11 H 0.767(4) 0.698(3) 0.5097(19) 0.053(6) Uiso 1 1 d . . . 
 
loop_ 
 _atom_site_aniso_label 
 _atom_site_aniso_U_11 
 _atom_site_aniso_U_22 
 _atom_site_aniso_U_33 
 _atom_site_aniso_U_23 
 _atom_site_aniso_U_13 
 _atom_site_aniso_U_12 
Cu1 0.02626(15) 0.02454(15) 0.03900(17) -0.00738(11) -0.00898(11) -0.00602(11) 
O2 0.0311(6) 0.0270(6) 0.0595(8) -0.0125(5) -0.0142(5) -0.0034(5) 
N1 0.0274(6) 0.0243(6) 0.0306(6) -0.0057(5) -0.0033(5) -0.0075(5) 
C4 0.0291(7) 0.0321(8) 0.0297(8) -0.0052(6) -0.0011(6) -0.0120(6) 
C9 0.0276(7) 0.0256(7) 0.0271(7) -0.0036(6) -0.0011(6) -0.0093(6) 
C8 0.0300(8) 0.0257(7) 0.0358(8) -0.0047(6) -0.0033(6) -0.0093(6) 
C1 0.0320(8) 0.0257(7) 0.0379(8) -0.0087(6) -0.0037(6) -0.0070(6) 
N3 0.0527(11) 0.0687(13) 0.0711(12) -0.0254(10) -0.0049(9) -0.0321(10) 
C6 0.0449(10) 0.0331(8) 0.0388(9) -0.0097(7) -0.0016(7) -0.0218(8) 
C10 0.0372(9) 0.0350(9) 0.0375(9) -0.0111(7) -0.0020(7) -0.0151(7) 
C11 0.0337(9) 0.0341(9) 0.0403(9) -0.0090(7) -0.0020(7) -0.0098(7) 
C3 0.0263(8) 0.0379(9) 0.0426(9) -0.0075(7) -0.0078(7) -0.0065(7) 
C13 0.0329(8) 0.0436(10) 0.0334(8) -0.0064(7) -0.0011(6) -0.0166(7) 
N2 0.0458(10) 0.0596(12) 0.0670(12) -0.0077(9) -0.0037(9) -0.0078(9) 
C7 0.0367(9) 0.0254(8) 0.0446(9) -0.0085(7) -0.0021(7) -0.0089(7) 
C14 0.0346(9) 0.0501(11) 0.0417(10) -0.0051(8) -0.0037(7) -0.0173(8) 
C12 0.0322(8) 0.0371(9) 0.0323(8) -0.0057(7) -0.0011(6) -0.0138(7) 
C15 0.0324(9) 0.0549(11) 0.0411(9) -0.0095(8) -0.0037(7) -0.0189(8) 
C5 0.0326(8) 0.0411(9) 0.0375(9) -0.0084(7) -0.0038(7) -0.0186(7) 
C2 0.0302(8) 0.0291(8) 0.0476(10) -0.0075(7) -0.0067(7) -0.0009(7) 
 
_geom_special_details 
; 
 All esds (except the esd in the dihedral angle between two l.s. planes) 
 are estimated using the full covariance matrix.  The cell esds are taken 
 into account individually in the estimation of esds in distances, angles 
 and torsion angles; correlations between esds in cell parameters are only 
 used when they are defined by crystal symmetry.  An approximate (isotropic) 
 treatment of cell esds is used for estimating esds involving l.s. planes. 
; 
 
loop_ 
 _geom_bond_atom_site_label_1 
 _geom_bond_atom_site_label_2 
 _geom_bond_distance 
 _geom_bond_site_symmetry_2 
 _geom_bond_publ_flag 
Cu1 O2 1.9290(16) . ? 
Cu1 O2 1.9290(16) 2_777 ? 
Cu1 N1 1.9536(17) . ? 
Cu1 N1 1.9536(17) 2_777 ? 
O2 C8 1.315(2) . ? 
N1 C1 1.323(2) . ? 
N1 C9 1.358(2) . ? 
C4 C9 1.405(2) . ? 
C4 C5 1.414(2) . ? 
C4 C3 1.416(2) . ? 
C9 C8 1.434(2) . ? 
C8 C7 1.384(2) . ? 
C1 C2 1.398(2) . ? 
C1 H1 0.935(19) . ? 
N3 C15 1.143(3) . ? 
C6 C5 1.369(3) . ? 
C6 C7 1.404(3) . ? 
C6 H6 0.92(2) . ? 
C10 C11 1.343(3) . ? 
C10 C12 1.445(2) 2_676 ? 
C10 H10 0.9300 . ? 
C11 C12 1.440(2) . ? 
C11 H11 0.94(2) . ? 
C3 C2 1.364(3) . ? 
C3 H3 0.86(2) . ? 
C13 C12 1.375(2) . ? 
C13 C15 1.429(3) . ? 
C13 C14 1.440(3) . ? 
N2 C14 1.137(3) . ? 
C7 H7 0.90(2) . ? 
C12 C10 1.445(2) 2_676 ? 
C5 H5 0.88(2) . ? 
C2 H2 0.86(2) . ? 
 
loop_ 
 _geom_angle_atom_site_label_1 
 _geom_angle_atom_site_label_2 
 _geom_angle_atom_site_label_3 
 _geom_angle 
 _geom_angle_site_symmetry_1 
 _geom_angle_site_symmetry_3 
 _geom_angle_publ_flag 
O2 Cu1 O2 179.999(2) . 2_777 ? 
O2 Cu1 N1 84.39(5) . . ? 
O2 Cu1 N1 95.62(5) 2_777 . ? 
O2 Cu1 N1 95.61(5) . 2_777 ? 
O2 Cu1 N1 84.38(5) 2_777 2_777 ? 
N1 Cu1 N1 179.999(1) . 2_777 ? 
C8 O2 Cu1 112.22(10) . . ? 
C1 N1 C9 119.43(14) . . ? 
C1 N1 Cu1 129.30(11) . . ? 
C9 N1 Cu1 111.26(10) . . ? 
C9 C4 C5 118.01(15) . . ? 
C9 C4 C3 116.43(15) . . ? 
C5 C4 C3 125.56(15) . . ? 
N1 C9 C4 122.55(14) . . ? 
N1 C9 C8 114.64(14) . . ? 
C4 C9 C8 122.81(14) . . ? 
O2 C8 C7 125.78(15) . . ? 
O2 C8 C9 117.47(14) . . ? 
C7 C8 C9 116.75(15) . . ? 
N1 C1 C2 121.94(15) . . ? 
N1 C1 H1 115.7(12) . . ? 
C2 C1 H1 122.4(12) . . ? 
C5 C6 C7 122.78(15) . . ? 
C5 C6 H6 119.1(13) . . ? 
C7 C6 H6 118.1(13) . . ? 
C11 C10 C12 120.73(16) . 2_676 ? 
C11 C10 H10 119.6 . . ? 
C12 C10 H10 119.6 2_676 . ? 
C10 C11 C12 121.28(16) . . ? 
C10 C11 H11 122.0(14) . . ? 
C12 C11 H11 116.7(14) . . ? 
C2 C3 C4 120.26(16) . . ? 
C2 C3 H3 118.8(14) . . ? 
C4 C3 H3 121.0(14) . . ? 
C12 C13 C15 121.77(16) . . ? 
C12 C13 C14 122.55(16) . . ? 
C15 C13 C14 115.61(16) . . ? 
C8 C7 C6 120.47(15) . . ? 
C8 C7 H7 119.1(13) . . ? 
C6 C7 H7 120.4(13) . . ? 
N2 C14 C13 177.2(2) . . ? 
C13 C12 C11 121.10(16) . . ? 
C13 C12 C10 120.90(16) . 2_676 ? 
C11 C12 C10 117.98(15) . 2_676 ? 
N3 C15 C13 178.3(2) . . ? 
C6 C5 C4 119.17(16) . . ? 
C6 C5 H5 124.1(13) . . ? 
C4 C5 H5 116.8(13) . . ? 
C3 C2 C1 119.39(16) . . ? 
C3 C2 H2 120.7(14) . . ? 
C1 C2 H2 119.9(14) . . ? 
 
_diffrn_measured_fraction_theta_max    0.985 
_diffrn_reflns_theta_full              27.50 
_diffrn_measured_fraction_theta_full   0.985 
_refine_diff_density_max    0.271 
_refine_diff_density_min   -0.269 
_refine_diff_density_rms    0.067 
#===END
 
data_FormII 
 
_audit_creation_method            SHELXL-97 
_chemical_name_systematic 
; 
 ? 
; 
_chemical_name_common             ? 
_chemical_melting_point           ? 
_chemical_formula_moiety          'C18 H12 Cu N2 O2, C12 H4 N4'
_chemical_formula_sum 
 'C30 H16 Cu N6 O2' 
_chemical_formula_weight          556.04 
 
loop_ 
 _atom_type_symbol 
 _atom_type_description 
 _atom_type_scat_dispersion_real 
 _atom_type_scat_dispersion_imag 
 _atom_type_scat_source 
 'C'  'C'   0.0033   0.0016 
 'International Tables Vol C Tables 4.2.6.8 and 6.1.1.4' 
 'H'  'H'   0.0000   0.0000 
 'International Tables Vol C Tables 4.2.6.8 and 6.1.1.4' 
 'N'  'N'   0.0061   0.0033 
 'International Tables Vol C Tables 4.2.6.8 and 6.1.1.4' 
 'O'  'O'   0.0106   0.0060 
 'International Tables Vol C Tables 4.2.6.8 and 6.1.1.4' 
 'Cu'  'Cu'   0.3201   1.2651 
 'International Tables Vol C Tables 4.2.6.8 and 6.1.1.4' 
 
_symmetry_cell_setting           'Triclinic'
_symmetry_space_group_name_H-M   'P-1 '
_symmetry_space_group_name_Hall   '-P 1 '
 
loop_ 
 _symmetry_equiv_pos_as_xyz 
 'x, y, z' 
 '-x, -y, -z' 
 
_cell_length_a                    8.0350(5) 
_cell_length_b                    8.2606(6) 
_cell_length_c                    9.7665(7) 
_cell_angle_alpha                 77.2600(10) 
_cell_angle_beta                  73.5540(10) 
_cell_angle_gamma                 78.1320(10) 
_cell_volume                      599.26(7) 
_cell_formula_units_Z             1 
_cell_measurement_temperature     296(2) 
_cell_measurement_reflns_used      4970
_cell_measurement_theta_min        2.56
_cell_measurement_theta_max       26.41
 
_exptl_crystal_description       'plate'
_exptl_crystal_colour            'black'
_exptl_crystal_size_max           0.49 
_exptl_crystal_size_mid           0.34 
_exptl_crystal_size_min           0.10 
_exptl_crystal_density_meas       ? 
_exptl_crystal_density_diffrn     1.541 
_exptl_crystal_density_method     'not measured' 
_exptl_crystal_F_000              283 
_exptl_absorpt_coefficient_mu     0.954 
_exptl_absorpt_correction_type    'multi-scan'
_exptl_absorpt_correction_T_min   0.6521 
_exptl_absorpt_correction_T_max   0.9140 
_exptl_absorpt_process_details    'APEX2 Software Suite (Bruker,2009)' 
 
_exptl_special_details 
; 
 ? 
; 
 
_diffrn_ambient_temperature       296(2) 
_diffrn_radiation_wavelength      0.71073 
_diffrn_radiation_type            MoK\a 
_diffrn_radiation_source          'fine-focus sealed tube' 
_diffrn_radiation_monochromator   graphite 
_diffrn_measurement_device_type  'Bruker APEX-II CCD'
_diffrn_measurement_method       '\f and \w scans'
_diffrn_detector_area_resol_mean  ? 
_diffrn_reflns_number             6572 
_diffrn_reflns_av_R_equivalents   0.0171 
_diffrn_reflns_av_sigmaI/netI     0.0172 
_diffrn_reflns_limit_h_min        -10 
_diffrn_reflns_limit_h_max        10 
_diffrn_reflns_limit_k_min        -10 
_diffrn_reflns_limit_k_max        10 
_diffrn_reflns_limit_l_min        -12 
_diffrn_reflns_limit_l_max        12 
_diffrn_reflns_theta_min          2.21 
_diffrn_reflns_theta_max          26.43 
_reflns_number_total              2453 
_reflns_number_gt                 2411 
_reflns_threshold_expression      >2sigma(I) 
 
_computing_data_collection      'Bruker APEX2'
_computing_cell_refinement      'Bruker SAINT'
_computing_data_reduction       'Bruker SAINT'  
_computing_structure_solution   'SHELXS-97 (Sheldrick, 2008)'
_computing_structure_refinement 'SHELXL-97 (Sheldrick, 2008)'
_computing_molecular_graphics   'Bruker SHELXTL'
_computing_publication_material 'Bruker SHELXTL'
 
_refine_special_details 
; 
 Refinement of F^2^ against ALL reflections.  The weighted R-factor wR and 
 goodness of fit S are based on F^2^, conventional R-factors R are based 
 on F, with F set to zero for negative F^2^. The threshold expression of 
 F^2^ > 2sigma(F^2^) is used only for calculating R-factors(gt) etc. and is 
 not relevant to the choice of reflections for refinement.  R-factors based 
 on F^2^ are statistically about twice as large as those based on F, and R- 
 factors based on ALL data will be even larger. 
; 
 
_refine_ls_structure_factor_coef  Fsqd  
_refine_ls_matrix_type            full 
_refine_ls_weighting_scheme       calc  
_refine_ls_weighting_details 
 'calc w=1/[\s^2^(Fo^2^)+(0.0528P)^2^+0.1927P] where P=(Fo^2^+2Fc^2^)/3' 
_atom_sites_solution_primary      direct 
_atom_sites_solution_secondary    difmap 
_atom_sites_solution_hydrogens    geom 
_refine_ls_hydrogen_treatment     constr 
_refine_ls_extinction_method      none 
_refine_ls_extinction_coef        ? 
_refine_ls_number_reflns          2453 
_refine_ls_number_parameters      178 
_refine_ls_number_restraints      0 
_refine_ls_R_factor_all           0.0257 
_refine_ls_R_factor_gt            0.0253 
_refine_ls_wR_factor_ref          0.0764 
_refine_ls_wR_factor_gt           0.0760 
_refine_ls_goodness_of_fit_ref    0.991 
_refine_ls_restrained_S_all       0.991 
_refine_ls_shift/su_max           0.000 
_refine_ls_shift/su_mean          0.000 
 
loop_ 
 _atom_site_label 
 _atom_site_type_symbol 
 _atom_site_fract_x 
 _atom_site_fract_y 
 _atom_site_fract_z 
 _atom_site_U_iso_or_equiv 
 _atom_site_adp_type 
 _atom_site_occupancy 
 _atom_site_symmetry_multiplicity 
 _atom_site_calc_flag 
 _atom_site_refinement_flags 
 _atom_site_disorder_assembly 
 _atom_site_disorder_group 
Cu1 Cu 1.0000 0.0000 1.0000 0.02869(11) Uani 1 2 d S . . 
O1 O 0.92332(16) -0.09131(14) 0.86629(13) 0.0360(3) Uani 1 1 d . . . 
N1 N 0.94173(17) 0.21642(16) 0.88088(14) 0.0297(3) Uani 1 1 d . . . 
N2 N 0.6966(2) 0.7946(2) 0.42294(19) 0.0547(4) Uani 1 1 d . . . 
N3 N 0.6093(3) 0.4278(2) 0.1987(2) 0.0600(5) Uani 1 1 d . . . 
C1 C 0.9525(2) 0.3690(2) 0.89602(19) 0.0377(4) Uani 1 1 d . . . 
H1 H 0.9916 0.3815 0.9735 0.045 Uiso 1 1 calc R . . 
C2 C 0.9066(3) 0.5122(2) 0.7984(2) 0.0458(4) Uani 1 1 d . . . 
H2 H 0.9159 0.6182 0.8108 0.055 Uiso 1 1 calc R . . 
C3 C 0.8483(3) 0.4945(2) 0.68523(19) 0.0407(4) Uani 1 1 d . . . 
H3 H 0.8170 0.5891 0.6204 0.049 Uiso 1 1 calc R . . 
C4 C 0.8350(2) 0.3337(2) 0.66554(17) 0.0319(3) Uani 1 1 d . . . 
C5 C 0.88400(19) 0.19687(19) 0.76906(16) 0.0274(3) Uani 1 1 d . . . 
C6 C 0.87674(19) 0.02676(19) 0.76307(16) 0.0290(3) Uani 1 1 d . . . 
C7 C 0.8201(2) 0.0003(2) 0.64963(18) 0.0345(3) Uani 1 1 d . . . 
H7 H 0.8131 -0.1082 0.6421 0.041 Uiso 1 1 calc R . . 
C8 C 0.7730(2) 0.1366(2) 0.54563(17) 0.0369(4) Uani 1 1 d . . . 
H8 H 0.7375 0.1154 0.4694 0.044 Uiso 1 1 calc R . . 
C9 C 0.7776(2) 0.2994(2) 0.55254(17) 0.0370(4) Uani 1 1 d . . . 
H9 H 0.7431 0.3868 0.4832 0.044 Uiso 1 1 calc R . . 
C10 C 0.6517(2) 0.7690(2) 0.32948(19) 0.0394(4) Uani 1 1 d . . . 
C11 C 0.5980(2) 0.7383(2) 0.21128(18) 0.0348(3) Uani 1 1 d . . . 
C12 C 0.5493(2) 0.8673(2) 0.10730(17) 0.0326(3) Uani 1 1 d . . . 
C13 C 0.5497(2) 1.0402(2) 0.11430(18) 0.0355(3) Uani 1 1 d . . . 
H13 H 0.5825 1.0651 0.1904 0.043 Uiso 1 1 calc R . . 
C14 C 0.4970(2) 0.8341(2) -0.01158(18) 0.0355(3) Uani 1 1 d . . . 
H14 H 0.4953 0.7237 -0.0178 0.043 Uiso 1 1 calc R . . 
C15 C 0.6031(2) 0.5653(2) 0.20483(19) 0.0406(4) Uani 1 1 d . . . 
 
loop_ 
 _atom_site_aniso_label 
 _atom_site_aniso_U_11 
 _atom_site_aniso_U_22 
 _atom_site_aniso_U_33 
 _atom_site_aniso_U_23 
 _atom_site_aniso_U_13 
 _atom_site_aniso_U_12 
Cu1 0.03747(16) 0.02069(15) 0.03139(16) 0.00033(10) -0.01872(11) -0.00316(10) 
O1 0.0526(7) 0.0222(5) 0.0395(6) -0.0015(4) -0.0261(5) -0.0031(5) 
N1 0.0361(6) 0.0241(6) 0.0320(6) -0.0007(5) -0.0167(5) -0.0046(5) 
N2 0.0713(11) 0.0532(10) 0.0498(9) -0.0017(8) -0.0372(9) -0.0087(9) 
N3 0.0759(12) 0.0393(10) 0.0677(12) -0.0093(8) -0.0263(10) -0.0030(8) 
C1 0.0539(10) 0.0263(8) 0.0414(9) -0.0028(7) -0.0270(8) -0.0074(7) 
C2 0.0682(12) 0.0238(8) 0.0535(10) 0.0005(7) -0.0317(9) -0.0094(8) 
C3 0.0561(10) 0.0267(8) 0.0423(9) 0.0067(7) -0.0256(8) -0.0078(7) 
C4 0.0353(8) 0.0298(8) 0.0304(7) 0.0021(6) -0.0127(6) -0.0055(6) 
C5 0.0287(7) 0.0259(7) 0.0280(7) -0.0013(6) -0.0104(5) -0.0039(5) 
C6 0.0321(7) 0.0257(7) 0.0302(7) -0.0036(6) -0.0113(6) -0.0029(6) 
C7 0.0414(8) 0.0305(8) 0.0345(8) -0.0089(6) -0.0136(6) -0.0029(6) 
C8 0.0421(8) 0.0449(10) 0.0279(7) -0.0072(7) -0.0157(6) -0.0048(7) 
C9 0.0438(9) 0.0381(9) 0.0291(8) 0.0039(6) -0.0171(7) -0.0056(7) 
C10 0.0434(9) 0.0363(9) 0.0394(9) 0.0033(7) -0.0200(7) -0.0047(7) 
C11 0.0367(8) 0.0360(9) 0.0330(8) -0.0017(6) -0.0143(6) -0.0052(6) 
C12 0.0341(8) 0.0342(8) 0.0301(8) -0.0016(6) -0.0109(6) -0.0071(6) 
C13 0.0439(9) 0.0376(9) 0.0308(8) -0.0040(6) -0.0172(6) -0.0102(7) 
C14 0.0434(9) 0.0324(8) 0.0343(8) -0.0040(6) -0.0142(7) -0.0092(7) 
C15 0.0448(9) 0.0393(10) 0.0380(9) -0.0019(7) -0.0171(7) -0.0030(7) 
 
_geom_special_details 
; 
 All esds (except the esd in the dihedral angle between two l.s. planes) 
 are estimated using the full covariance matrix.  The cell esds are taken 
 into account individually in the estimation of esds in distances, angles 
 and torsion angles; correlations between esds in cell parameters are only 
 used when they are defined by crystal symmetry.  An approximate (isotropic) 
 treatment of cell esds is used for estimating esds involving l.s. planes. 
; 
 
loop_ 
 _geom_bond_atom_site_label_1 
 _geom_bond_atom_site_label_2 
 _geom_bond_distance 
 _geom_bond_site_symmetry_2 
 _geom_bond_publ_flag 
Cu1 O1 1.9326(11) . ? 
Cu1 O1 1.9326(11) 2_757 ? 
Cu1 N1 1.9533(13) . ? 
Cu1 N1 1.9534(12) 2_757 ? 
O1 C6 1.3181(19) . ? 
N1 C1 1.324(2) . ? 
N1 C5 1.3525(19) . ? 
N2 C10 1.145(2) . ? 
N3 C15 1.141(3) . ? 
C1 C2 1.402(2) . ? 
C1 H1 0.9300 . ? 
C2 C3 1.362(3) . ? 
C2 H2 0.9300 . ? 
C3 C4 1.413(2) . ? 
C3 H3 0.9300 . ? 
C4 C9 1.411(2) . ? 
C4 C5 1.412(2) . ? 
C5 C6 1.433(2) . ? 
C6 C7 1.384(2) . ? 
C7 C8 1.407(2) . ? 
C7 H7 0.9300 . ? 
C8 C9 1.370(3) . ? 
C8 H8 0.9300 . ? 
C9 H9 0.9300 . ? 
C10 C11 1.428(2) . ? 
C11 C12 1.377(2) . ? 
C11 C15 1.436(2) . ? 
C12 C14 1.437(2) . ? 
C12 C13 1.445(2) . ? 
C13 C14 1.349(2) 2_675 ? 
C13 H13 0.9300 . ? 
C14 C13 1.349(2) 2_675 ? 
C14 H14 0.9300 . ? 
 
loop_ 
 _geom_angle_atom_site_label_1 
 _geom_angle_atom_site_label_2 
 _geom_angle_atom_site_label_3 
 _geom_angle 
 _geom_angle_site_symmetry_1 
 _geom_angle_site_symmetry_3 
 _geom_angle_publ_flag 
O1 Cu1 O1 179.999(1) . 2_757 ? 
O1 Cu1 N1 84.53(5) . . ? 
O1 Cu1 N1 95.47(5) 2_757 . ? 
O1 Cu1 N1 95.48(5) . 2_757 ? 
O1 Cu1 N1 84.52(5) 2_757 2_757 ? 
N1 Cu1 N1 179.999(1) . 2_757 ? 
C6 O1 Cu1 111.82(9) . . ? 
C1 N1 C5 119.56(13) . . ? 
C1 N1 Cu1 129.31(11) . . ? 
C5 N1 Cu1 111.13(10) . . ? 
N1 C1 C2 121.82(15) . . ? 
N1 C1 H1 119.1 . . ? 
C2 C1 H1 119.1 . . ? 
C3 C2 C1 119.29(16) . . ? 
C3 C2 H2 120.4 . . ? 
C1 C2 H2 120.4 . . ? 
C2 C3 C4 120.52(15) . . ? 
C2 C3 H3 119.7 . . ? 
C4 C3 H3 119.7 . . ? 
C9 C4 C5 118.05(14) . . ? 
C9 C4 C3 125.72(14) . . ? 
C5 C4 C3 116.23(14) . . ? 
N1 C5 C4 122.58(14) . . ? 
N1 C5 C6 115.03(13) . . ? 
C4 C5 C6 122.39(14) . . ? 
O1 C6 C7 125.43(14) . . ? 
O1 C6 C5 117.44(13) . . ? 
C7 C6 C5 117.12(14) . . ? 
C6 C7 C8 120.45(15) . . ? 
C6 C7 H7 119.8 . . ? 
C8 C7 H7 119.8 . . ? 
C9 C8 C7 122.42(15) . . ? 
C9 C8 H8 118.8 . . ? 
C7 C8 H8 118.8 . . ? 
C8 C9 C4 119.56(14) . . ? 
C8 C9 H9 120.2 . . ? 
C4 C9 H9 120.2 . . ? 
N2 C10 C11 179.1(2) . . ? 
C12 C11 C10 121.72(15) . . ? 
C12 C11 C15 122.11(15) . . ? 
C10 C11 C15 116.14(15) . . ? 
C11 C12 C14 120.98(15) . . ? 
C11 C12 C13 121.00(15) . . ? 
C14 C12 C13 118.02(15) . . ? 
C14 C13 C12 120.71(15) 2_675 . ? 
C14 C13 H13 119.6 2_675 . ? 
C12 C13 H13 119.6 . . ? 
C13 C14 C12 121.28(15) 2_675 . ? 
C13 C14 H14 119.4 2_675 . ? 
C12 C14 H14 119.4 . . ? 
N3 C15 C11 179.1(2) . . ? 
 
_diffrn_measured_fraction_theta_max    0.995 
_diffrn_reflns_theta_full              26.43 
_diffrn_measured_fraction_theta_full   0.995 
_refine_diff_density_max    0.284 
_refine_diff_density_min   -0.302 
_refine_diff_density_rms    0.079 
#===END
 
data_FormII100K
 
_audit_creation_method            SHELXL-97
_chemical_name_systematic
;
 ?
;
_chemical_name_common             ?
_chemical_melting_point           ?
_chemical_formula_moiety          'C18 H12 Cu N2 O2, C12 H4 N4' 
_chemical_formula_sum
 'C30 H16 Cu N6 O2'
_chemical_formula_weight          556.03
 
loop_
 _atom_type_symbol
 _atom_type_description
 _atom_type_scat_dispersion_real
 _atom_type_scat_dispersion_imag
 _atom_type_scat_source
 'C'  'C'   0.0033   0.0016
 'International Tables Vol C Tables 4.2.6.8 and 6.1.1.4'
 'H'  'H'   0.0000   0.0000
 'International Tables Vol C Tables 4.2.6.8 and 6.1.1.4'
 'N'  'N'   0.0061   0.0033
 'International Tables Vol C Tables 4.2.6.8 and 6.1.1.4'
 'O'  'O'   0.0106   0.0060
 'International Tables Vol C Tables 4.2.6.8 and 6.1.1.4'
 'Cu'  'Cu'   0.3201   1.2651
 'International Tables Vol C Tables 4.2.6.8 and 6.1.1.4'
 
_symmetry_cell_setting           'Triclinic'
_symmetry_space_group_name_H-M   'P-1   '
_symmetry_space_group_name_Hall  '-P 1   '
 
loop_
 _symmetry_equiv_pos_as_xyz
 'x, y, z'
 '-x, -y, -z'
 
_cell_length_a                    7.9345(4)
_cell_length_b                    8.2352(4)
_cell_length_c                    9.7232(4)
_cell_angle_alpha                 77.500(1)
_cell_angle_beta                  72.920(3)
_cell_angle_gamma                 77.610(1)
_cell_volume                      585.09(5)
_cell_formula_units_Z             1
_cell_measurement_temperature     100(2)
__cell_measurement_reflns_used    6083
_cell_measurement_theta_min        2.22
_cell_measurement_theta_max       27.51
 
_exptl_crystal_description       'plate'
_exptl_crystal_colour            'black'
_exptl_crystal_size_min          0.07
_exptl_crystal_size_mid          0.33
_exptl_crystal_size_max          0.495
_exptl_crystal_density_meas       ?
_exptl_crystal_density_diffrn     1.578
_exptl_crystal_density_method     'not measured'
_exptl_crystal_F_000              283
_exptl_absorpt_coefficient_mu     0.977
_exptl_absorpt_correction_type    'multi-scan'
_exptl_absorpt_correction_T_min   0.6434
_exptl_absorpt_correction_T_max   0.9347
_exptl_absorpt_process_details     'APEX2 Software Suite (Bruker,2009)'  
 
_exptl_special_details
;
 ?
;
 
_diffrn_ambient_temperature       100(2)
_diffrn_radiation_wavelength      0.71073
_diffrn_radiation_type            MoK\a
_diffrn_radiation_source          'fine-focus sealed tube'
_diffrn_radiation_monochromator   graphite
_diffrn_measurement_device_type  'Bruker APEX-II CCD'
_diffrn_measurement_method       '\f and \w scans'
_diffrn_detector_area_resol_mean  ?
_diffrn_standards_number          ?
_diffrn_standards_interval_count  ?
_diffrn_standards_interval_time   ?
_diffrn_standards_decay_%         ?
_diffrn_reflns_number             6858
_diffrn_reflns_av_R_equivalents   0.0166
_diffrn_reflns_av_sigmaI/netI     0.0163
_diffrn_reflns_limit_h_min        -10
_diffrn_reflns_limit_h_max        10
_diffrn_reflns_limit_k_min        -10
_diffrn_reflns_limit_k_max        10
_diffrn_reflns_limit_l_min        -12
_diffrn_reflns_limit_l_max        12
_diffrn_reflns_theta_min          2.22
_diffrn_reflns_theta_max          27.51
_reflns_number_total              2657
_reflns_number_gt                 2645
_reflns_threshold_expression      >2sigma(I)
 
_computing_data_collection      'Bruker APEX2'
_computing_cell_refinement      'Bruker SAINT'
_computing_data_reduction       'Bruker SAINT'  
_computing_structure_solution   'SHELXS-97 (Sheldrick, 2008)'
_computing_structure_refinement 'SHELXL-97 (Sheldrick, 2008)'
_computing_molecular_graphics   'Bruker SHELXTL'
_computing_publication_material 'Bruker SHELXTL' 
_refine_special_details
;
 Refinement of F^2^ against ALL reflections.  The weighted R-factor wR and
 goodness of fit S are based on F^2^, conventional R-factors R are based
 on F, with F set to zero for negative F^2^. The threshold expression of
 F^2^ > 2sigma(F^2^) is used only for calculating R-factors(gt) etc. and is
 not relevant to the choice of reflections for refinement.  R-factors based
 on F^2^ are statistically about twice as large as those based on F, and R-
 factors based on ALL data will be even larger.
;
 
_refine_ls_structure_factor_coef  Fsqd
_refine_ls_matrix_type            full
_refine_ls_weighting_scheme       calc
_refine_ls_weighting_details
 'calc w=1/[\s^2^(Fo^2^)+(0.0430P)^2^+0.3816P] where P=(Fo^2^+2Fc^2^)/3'
_atom_sites_solution_primary      direct
_atom_sites_solution_secondary    difmap
_atom_sites_solution_hydrogens    geom
_refine_ls_hydrogen_treatment     constr
_refine_ls_extinction_method      none
_refine_ls_extinction_coef        ?
_refine_ls_number_reflns          2657
_refine_ls_number_parameters      178
_refine_ls_number_restraints      0
_refine_ls_R_factor_all           0.0231
_refine_ls_R_factor_gt            0.0230
_refine_ls_wR_factor_ref          0.0671
_refine_ls_wR_factor_gt           0.0671
_refine_ls_goodness_of_fit_ref    0.976
_refine_ls_restrained_S_all       0.976
_refine_ls_shift/su_max           0.000
_refine_ls_shift/su_mean          0.000
 
loop_
 _atom_site_label
 _atom_site_type_symbol
 _atom_site_fract_x
 _atom_site_fract_y
 _atom_site_fract_z
 _atom_site_U_iso_or_equiv
 _atom_site_adp_type
 _atom_site_occupancy
 _atom_site_symmetry_multiplicity
 _atom_site_calc_flag
 _atom_site_refinement_flags
 _atom_site_disorder_assembly
 _atom_site_disorder_group
Cu1 Cu 0.0000 1.0000 0.0000 0.01207(8) Uani 1 2 d S . .
O1 O -0.07750(13) 0.90736(12) -0.13381(10) 0.01623(19) Uani 1 1 d . . .
N1 N 0.38866(18) 1.57596(16) -0.19750(15) 0.0258(3) Uani 1 1 d . . .
N2 N 0.30196(17) 1.20500(16) -0.42381(14) 0.0234(3) Uani 1 1 d . . .
N3 N -0.05805(14) 1.21646(14) -0.11961(12) 0.0131(2) Uani 1 1 d . . .
C1 C 0.39525(18) 1.43712(18) -0.20418(14) 0.0175(3) Uani 1 1 d . . .
C2 C 0.40085(17) 1.26367(17) -0.21138(14) 0.0155(2) Uani 1 1 d . . .
C3 C 0.44997(17) 1.13385(16) -0.10727(14) 0.0145(2) Uani 1 1 d . . .
C4 C 0.50275(17) 1.16697(17) 0.01248(14) 0.0157(2) Uani 1 1 d . . .
H4 H 0.5041 1.2776 0.0193 0.019 Uiso 1 1 calc R . .
C5 C 0.44962(17) 0.95977(17) -0.11501(14) 0.0154(2) Uani 1 1 d . . .
H5 H 0.4163 0.9352 -0.1913 0.019 Uiso 1 1 calc R . .
C6 C 0.34707(18) 1.23227(17) -0.33023(15) 0.0170(3) Uani 1 1 d . . .
C7 C -0.11662(16) 1.19657(16) -0.23187(14) 0.0125(2) Uani 1 1 d . . .
C8 C -0.16579(17) 1.33371(17) -0.33564(14) 0.0143(2) Uani 1 1 d . . .
C9 C -0.22390(18) 1.29971(17) -0.44931(14) 0.0164(3) Uani 1 1 d . . .
H9 H -0.2584 1.3873 -0.5188 0.020 Uiso 1 1 calc R . .
C10 C -0.22879(17) 1.13506(17) -0.45602(14) 0.0160(3) Uani 1 1 d . . .
H10 H -0.2645 1.1134 -0.5323 0.019 Uiso 1 1 calc R . .
C11 C -0.18163(17) 0.99883(17) -0.35135(14) 0.0156(2) Uani 1 1 d . . .
H11 H -0.1888 0.8899 -0.3587 0.019 Uiso 1 1 calc R . .
C12 C -0.12445(16) 1.02560(16) -0.23729(14) 0.0130(2) Uani 1 1 d . . .
C13 C -0.15195(19) 1.49588(17) -0.31667(15) 0.0177(3) Uani 1 1 d . . .
H13 H -0.1830 1.5904 -0.3819 0.021 Uiso 1 1 calc R . .
C14 C -0.0929(2) 1.51380(17) -0.20231(16) 0.0199(3) Uani 1 1 d . . .
H14 H -0.0836 1.6200 -0.1897 0.024 Uiso 1 1 calc R . .
C15 C -0.04653(18) 1.36978(17) -0.10447(15) 0.0168(3) Uani 1 1 d . . .
H15 H -0.0067 1.3823 -0.0270 0.020 Uiso 1 1 calc R . .
 
loop_
 _atom_site_aniso_label
 _atom_site_aniso_U_11
 _atom_site_aniso_U_22
 _atom_site_aniso_U_33
 _atom_site_aniso_U_23
 _atom_site_aniso_U_13
 _atom_site_aniso_U_12
Cu1 0.01556(12) 0.00895(12) 0.01312(12) 0.00064(8) -0.00783(8) -0.00173(8)
O1 0.0221(5) 0.0112(4) 0.0177(4) -0.0001(3) -0.0110(4) -0.0016(3)
N1 0.0312(7) 0.0192(6) 0.0281(7) -0.0037(5) -0.0110(5) -0.0019(5)
N2 0.0291(7) 0.0218(6) 0.0223(6) 0.0000(5) -0.0141(5) -0.0039(5)
N3 0.0146(5) 0.0112(5) 0.0141(5) 0.0000(4) -0.0063(4) -0.0019(4)
C1 0.0175(6) 0.0193(7) 0.0154(6) -0.0004(5) -0.0068(5) -0.0016(5)
C2 0.0152(6) 0.0172(6) 0.0146(6) -0.0013(5) -0.0054(5) -0.0029(5)
C3 0.0137(6) 0.0160(6) 0.0136(6) -0.0006(5) -0.0037(5) -0.0034(5)
C4 0.0173(6) 0.0155(6) 0.0157(6) -0.0025(5) -0.0048(5) -0.0047(5)
C5 0.0173(6) 0.0178(6) 0.0136(6) -0.0026(5) -0.0061(5) -0.0048(5)
C6 0.0177(6) 0.0148(6) 0.0176(6) 0.0021(5) -0.0072(5) -0.0018(5)
C7 0.0114(5) 0.0132(6) 0.0128(5) -0.0010(4) -0.0035(4) -0.0022(4)
C8 0.0140(6) 0.0146(6) 0.0137(6) 0.0005(5) -0.0043(5) -0.0029(4)
C9 0.0175(6) 0.0181(6) 0.0131(6) 0.0016(5) -0.0064(5) -0.0027(5)
C10 0.0163(6) 0.0208(7) 0.0121(6) -0.0033(5) -0.0055(5) -0.0025(5)
C11 0.0170(6) 0.0145(6) 0.0161(6) -0.0039(5) -0.0048(5) -0.0018(5)
C12 0.0125(5) 0.0124(6) 0.0134(6) -0.0011(4) -0.0038(4) -0.0011(4)
C13 0.0227(6) 0.0126(6) 0.0183(6) 0.0033(5) -0.0099(5) -0.0036(5)
C14 0.0274(7) 0.0112(6) 0.0238(7) -0.0001(5) -0.0118(6) -0.0043(5)
C15 0.0219(6) 0.0135(6) 0.0182(6) -0.0016(5) -0.0105(5) -0.0035(5)
 
_geom_special_details
;
 All esds (except the esd in the dihedral angle between two l.s. planes)
 are estimated using the full covariance matrix.  The cell esds are taken
 into account individually in the estimation of esds in distances, angles
 and torsion angles; correlations between esds in cell parameters are only
 used when they are defined by crystal symmetry.  An approximate (isotropic)
 treatment of cell esds is used for estimating esds involving l.s. planes.
;
 
loop_
 _geom_bond_atom_site_label_1
 _geom_bond_atom_site_label_2
 _geom_bond_distance
 _geom_bond_site_symmetry_2
 _geom_bond_publ_flag
Cu1 O1 1.9375(9) . ?
Cu1 O1 1.9375(9) 2_575 ?
Cu1 N3 1.9512(11) . ?
Cu1 N3 1.9512(11) 2_575 ?
O1 C12 1.3190(16) . ?
N1 C1 1.148(2) . ?
N2 C6 1.1492(19) . ?
N3 C15 1.3275(17) . ?
N3 C7 1.3573(16) . ?
C1 C2 1.4358(19) . ?
C2 C3 1.3798(18) . ?
C2 C6 1.4321(18) . ?
C3 C4 1.4416(18) . ?
C3 C5 1.4524(18) . ?
C4 C5 1.3519(19) 2_675 ?
C4 H4 0.9300 . ?
C5 C4 1.3519(19) 2_675 ?
C5 H5 0.9300 . ?
C7 C8 1.4123(17) . ?
C7 C12 1.4355(17) . ?
C8 C9 1.4147(18) . ?
C8 C13 1.4181(18) . ?
C9 C10 1.3808(19) . ?
C9 H9 0.9300 . ?
C10 C11 1.4084(18) . ?
C10 H10 0.9300 . ?
C11 C12 1.3888(18) . ?
C11 H11 0.9300 . ?
C13 C14 1.3730(19) . ?
C13 H13 0.9300 . ?
C14 C15 1.4059(18) . ?
C14 H14 0.9300 . ?
C15 H15 0.9300 . ?
 
loop_
 _geom_angle_atom_site_label_1
 _geom_angle_atom_site_label_2
 _geom_angle_atom_site_label_3
 _geom_angle
 _geom_angle_site_symmetry_1
 _geom_angle_site_symmetry_3
 _geom_angle_publ_flag
O1 Cu1 O1 180.00(3) . 2_575 ?
O1 Cu1 N3 84.65(4) . . ?
O1 Cu1 N3 95.35(4) 2_575 . ?
O1 Cu1 N3 95.35(4) . 2_575 ?
O1 Cu1 N3 84.65(4) 2_575 2_575 ?
N3 Cu1 N3 180.00(6) . 2_575 ?
C12 O1 Cu1 111.67(8) . . ?
C15 N3 C7 119.67(11) . . ?
C15 N3 Cu1 129.15(9) . . ?
C7 N3 Cu1 111.17(8) . . ?
N1 C1 C2 179.18(16) . . ?
C3 C2 C6 121.48(12) . . ?
C3 C2 C1 122.08(12) . . ?
C6 C2 C1 116.41(12) . . ?
C2 C3 C4 121.02(12) . . ?
C2 C3 C5 120.93(12) . . ?
C4 C3 C5 118.05(12) . . ?
C5 C4 C3 121.23(12) 2_675 . ?
C5 C4 H4 119.4 2_675 . ?
C3 C4 H4 119.4 . . ?
C4 C5 C3 120.72(12) 2_675 . ?
C4 C5 H5 119.6 2_675 . ?
C3 C5 H5 119.6 . . ?
N2 C6 C2 178.72(15) . . ?
N3 C7 C8 122.52(12) . . ?
N3 C7 C12 114.93(11) . . ?
C8 C7 C12 122.55(12) . . ?
C7 C8 C9 118.22(12) . . ?
C7 C8 C13 116.51(12) . . ?
C9 C8 C13 125.27(12) . . ?
C10 C9 C8 119.30(12) . . ?
C10 C9 H9 120.4 . . ?
C8 C9 H9 120.4 . . ?
C9 C10 C11 122.30(12) . . ?
C9 C10 H10 118.9 . . ?
C11 C10 H10 118.9 . . ?
C12 C11 C10 120.62(12) . . ?
C12 C11 H11 119.7 . . ?
C10 C11 H11 119.7 . . ?
O1 C12 C11 125.46(12) . . ?
O1 C12 C7 117.54(11) . . ?
C11 C12 C7 116.99(11) . . ?
C14 C13 C8 120.22(12) . . ?
C14 C13 H13 119.9 . . ?
C8 C13 H13 119.9 . . ?
C13 C14 C15 119.26(12) . . ?
C13 C14 H14 120.4 . . ?
C15 C14 H14 120.4 . . ?
N3 C15 C14 121.81(12) . . ?
N3 C15 H15 119.1 . . ?
C14 C15 H15 119.1 . . ?
 
_diffrn_measured_fraction_theta_max    0.985
_diffrn_reflns_theta_full              27.51
_diffrn_measured_fraction_theta_full   0.985
_refine_diff_density_max    0.380
_refine_diff_density_min   -0.332
_refine_diff_density_rms    0.073
#===END
 
data_FormII125K
 
_audit_creation_method            SHELXL-97
_chemical_name_systematic
;
 ?
;
_chemical_name_common             ?
_chemical_melting_point           ?
_chemical_formula_moiety          'C18 H12 Cu N2 O2, C12 H4 N4'
_chemical_formula_sum
 'C30 H16 Cu N6 O2'
_chemical_formula_weight          556.03
 
loop_
 _atom_type_symbol
 _atom_type_description
 _atom_type_scat_dispersion_real
 _atom_type_scat_dispersion_imag
 _atom_type_scat_source
 'C'  'C'   0.0033   0.0016
 'International Tables Vol C Tables 4.2.6.8 and 6.1.1.4'
 'H'  'H'   0.0000   0.0000
 'International Tables Vol C Tables 4.2.6.8 and 6.1.1.4'
 'N'  'N'   0.0061   0.0033
 'International Tables Vol C Tables 4.2.6.8 and 6.1.1.4'
 'O'  'O'   0.0106   0.0060
 'International Tables Vol C Tables 4.2.6.8 and 6.1.1.4'
 'Cu'  'Cu'   0.3201   1.2651
 'International Tables Vol C Tables 4.2.6.8 and 6.1.1.4'
 
_symmetry_cell_setting           'Triclinic'
_symmetry_space_group_name_H-M   'P-1   '
_symmetry_space_group_name_Hall '-P 1'
 
loop_
 _symmetry_equiv_pos_as_xyz
 'x, y, z'
 '-x, -y, -z'
 
_cell_length_a                    7.9548(11)
_cell_length_b                    8.2408(12)
_cell_length_c                    9.7333(14)
_cell_angle_alpha                 77.4820(10)
_cell_angle_beta                  73.0310(10)
_cell_angle_gamma                 77.6950(10)
_cell_volume                      588.05(15)
_cell_formula_units_Z             1
_cell_measurement_temperature     125(2)
_cell_measurement_reflns_used    5245
_cell_measurement_theta_min        2.22
_cell_measurement_theta_max       26.53
 
_exptl_crystal_description       'plate'
_exptl_crystal_colour            'black'
_exptl_crystal_size_min          0.07
_exptl_crystal_size_mid          0.33
_exptl_crystal_size_max          0.495
_exptl_crystal_density_meas       ?
_exptl_crystal_density_diffrn     1.570
_exptl_crystal_density_method     'not measured'
_exptl_crystal_F_000              283
_exptl_absorpt_coefficient_mu     0.972
_exptl_absorpt_correction_type    'multi-scan'
_exptl_absorpt_correction_T_min   0.6447
_exptl_absorpt_correction_T_max   0.9342
_exptl_absorpt_process_details     'APEX2 Software Suite (Bruker,2009)'  
 
_exptl_special_details
;
 ?
;
 
_diffrn_ambient_temperature       125(2)
_diffrn_radiation_wavelength      0.71073
_diffrn_radiation_type            MoK\a
_diffrn_radiation_source          'fine-focus sealed tube'
_diffrn_radiation_monochromator   graphite
_diffrn_measurement_device_type  'Bruker APEX-II CCD'
_diffrn_measurement_method       '\f and \w scans'
_diffrn_detector_area_resol_mean  ?
_diffrn_standards_number          ?
_diffrn_standards_interval_count  ?
_diffrn_standards_interval_time   ?
_diffrn_standards_decay_%         ?
_diffrn_reflns_number             6454
_diffrn_reflns_av_R_equivalents   0.0173
_diffrn_reflns_av_sigmaI/netI     0.0173
_diffrn_reflns_limit_h_min        -9
_diffrn_reflns_limit_h_max        9
_diffrn_reflns_limit_k_min        -10
_diffrn_reflns_limit_k_max        10
_diffrn_reflns_limit_l_min        -12
_diffrn_reflns_limit_l_max        12
_diffrn_reflns_theta_min          2.22
_diffrn_reflns_theta_max          26.53
_reflns_number_total              2431
_reflns_number_gt                 2400
_reflns_threshold_expression      >2sigma(I)
 
_computing_data_collection      'Bruker APEX2'
_computing_cell_refinement      'Bruker SAINT'
_computing_data_reduction       'Bruker SAINT'  
_computing_structure_solution   'SHELXS-97 (Sheldrick, 2008)'
_computing_structure_refinement 'SHELXL-97 (Sheldrick, 2008)'
_computing_molecular_graphics   'Bruker SHELXTL'
_computing_publication_material 'Bruker SHELXTL'

 
_refine_special_details
;
 Refinement of F^2^ against ALL reflections.  The weighted R-factor wR and
 goodness of fit S are based on F^2^, conventional R-factors R are based
 on F, with F set to zero for negative F^2^. The threshold expression of
 F^2^ > 2sigma(F^2^) is used only for calculating R-factors(gt) etc. and is
 not relevant to the choice of reflections for refinement.  R-factors based
 on F^2^ are statistically about twice as large as those based on F, and R-
 factors based on ALL data will be even larger.
;
 
_refine_ls_structure_factor_coef  Fsqd
_refine_ls_matrix_type            full
_refine_ls_weighting_scheme       calc
_refine_ls_weighting_details
 'calc w=1/[\s^2^(Fo^2^)+(0.0422P)^2^+0.3476P] where P=(Fo^2^+2Fc^2^)/3'
_atom_sites_solution_primary      direct
_atom_sites_solution_secondary    difmap
_atom_sites_solution_hydrogens    geom
_refine_ls_hydrogen_treatment     constr
_refine_ls_extinction_method      none
_refine_ls_extinction_coef        ?
_refine_ls_number_reflns          2431
_refine_ls_number_parameters      178
_refine_ls_number_restraints      0
_refine_ls_R_factor_all           0.0231
_refine_ls_R_factor_gt            0.0229
_refine_ls_wR_factor_ref          0.0680
_refine_ls_wR_factor_gt           0.0677
_refine_ls_goodness_of_fit_ref    0.994
_refine_ls_restrained_S_all       0.994
_refine_ls_shift/su_max           0.000
_refine_ls_shift/su_mean          0.000
 
loop_
 _atom_site_label
 _atom_site_type_symbol
 _atom_site_fract_x
 _atom_site_fract_y
 _atom_site_fract_z
 _atom_site_U_iso_or_equiv
 _atom_site_adp_type
 _atom_site_occupancy
 _atom_site_symmetry_multiplicity
 _atom_site_calc_flag
 _atom_site_refinement_flags
 _atom_site_disorder_assembly
 _atom_site_disorder_group
Cu1 Cu 0.0000 0.0000 0.0000 0.01519(9) Uani 1 2 d S . .
O1 O 0.07751(14) 0.09237(13) 0.13380(12) 0.0199(2) Uani 1 1 d . . .
N1 N 0.05807(16) -0.21639(15) 0.11945(13) 0.0161(2) Uani 1 1 d . . .
N2 N 0.3891(2) 0.57530(19) -0.19784(17) 0.0322(3) Uani 1 1 d . . .
N3 N 0.3022(2) 0.20498(18) -0.42376(16) 0.0293(3) Uani 1 1 d . . .
C1 C 0.11639(18) -0.19658(18) 0.23170(15) 0.0153(3) Uani 1 1 d . . .
C2 C 0.12418(18) -0.02586(18) 0.23721(15) 0.0159(3) Uani 1 1 d . . .
C3 C 0.1814(2) 0.00070(19) 0.35112(16) 0.0191(3) Uani 1 1 d . . .
H3 H 0.1887 0.1095 0.3584 0.023 Uiso 1 1 calc R . .
C4 C 0.2284(2) -0.1354(2) 0.45571(16) 0.0198(3) Uani 1 1 d . . .
H4 H 0.2640 -0.1138 0.5320 0.024 Uiso 1 1 calc R . .
C5 C 0.2235(2) -0.2996(2) 0.44883(16) 0.0204(3) Uani 1 1 d . . .
H5 H 0.2580 -0.3871 0.5183 0.024 Uiso 1 1 calc R . .
C6 C 0.16568(19) -0.33377(19) 0.33544(16) 0.0177(3) Uani 1 1 d . . .
C7 C 0.1519(2) -0.49554(19) 0.31645(17) 0.0222(3) Uani 1 1 d . . .
H7 H 0.1829 -0.5900 0.3817 0.027 Uiso 1 1 calc R . .
C8 C 0.0930(2) -0.51353(19) 0.20223(18) 0.0250(3) Uani 1 1 d . . .
H8 H 0.0838 -0.6197 0.1897 0.030 Uiso 1 1 calc R . .
C9 C 0.0467(2) -0.36973(19) 0.10441(17) 0.0204(3) Uani 1 1 d . . .
H9 H 0.0071 -0.3824 0.0270 0.024 Uiso 1 1 calc R . .
C10 C 0.3955(2) 0.4369(2) -0.20428(16) 0.0215(3) Uani 1 1 d . . .
C11 C 0.40119(19) 0.26320(19) -0.21138(16) 0.0189(3) Uani 1 1 d . . .
C12 C 0.45022(19) 0.13369(19) -0.10734(16) 0.0181(3) Uani 1 1 d . . .
C13 C 0.5029(2) 0.16661(19) 0.01230(16) 0.0197(3) Uani 1 1 d . . .
H13 H 0.5042 0.2771 0.0191 0.024 Uiso 1 1 calc R . .
C14 C 0.4498(2) -0.04017(19) -0.11477(16) 0.0191(3) Uani 1 1 d . . .
H14 H 0.4164 -0.0648 -0.1910 0.023 Uiso 1 1 calc R . .
C15 C 0.3472(2) 0.23206(19) -0.33005(17) 0.0211(3) Uani 1 1 d . . .
 
loop_
 _atom_site_aniso_label
 _atom_site_aniso_U_11
 _atom_site_aniso_U_22
 _atom_site_aniso_U_33
 _atom_site_aniso_U_23
 _atom_site_aniso_U_13
 _atom_site_aniso_U_12
Cu1 0.01991(14) 0.01138(13) 0.01636(14) -0.00012(9) -0.00960(9) -0.00229(9)
O1 0.0277(5) 0.0136(5) 0.0213(5) -0.0009(4) -0.0131(4) -0.0021(4)
N1 0.0185(6) 0.0143(6) 0.0171(6) -0.0012(5) -0.0076(5) -0.0027(4)
N2 0.0395(8) 0.0236(8) 0.0351(8) -0.0056(6) -0.0135(7) -0.0022(6)
N3 0.0370(8) 0.0280(7) 0.0274(7) -0.0010(6) -0.0181(6) -0.0049(6)
C1 0.0145(6) 0.0162(7) 0.0150(6) -0.0018(5) -0.0041(5) -0.0027(5)
C2 0.0155(6) 0.0153(7) 0.0166(7) -0.0026(5) -0.0044(5) -0.0015(5)
C3 0.0210(7) 0.0178(7) 0.0194(7) -0.0058(6) -0.0052(6) -0.0023(5)
C4 0.0209(7) 0.0261(8) 0.0145(7) -0.0052(6) -0.0068(5) -0.0029(6)
C5 0.0223(7) 0.0222(7) 0.0161(7) 0.0019(6) -0.0078(6) -0.0034(6)
C6 0.0173(7) 0.0181(7) 0.0168(7) -0.0001(5) -0.0048(5) -0.0035(5)
C7 0.0289(8) 0.0161(7) 0.0223(7) 0.0035(6) -0.0123(6) -0.0043(6)
C8 0.0356(9) 0.0136(7) 0.0294(8) -0.0006(6) -0.0150(7) -0.0057(6)
C9 0.0276(8) 0.0167(7) 0.0215(7) -0.0025(6) -0.0131(6) -0.0043(6)
C10 0.0223(7) 0.0233(8) 0.0191(7) -0.0011(6) -0.0088(6) -0.0019(6)
C11 0.0188(7) 0.0207(7) 0.0179(7) -0.0025(6) -0.0061(5) -0.0036(5)
C12 0.0176(7) 0.0200(7) 0.0169(7) -0.0021(5) -0.0042(5) -0.0044(5)
C13 0.0226(7) 0.0191(7) 0.0192(7) -0.0039(6) -0.0061(6) -0.0055(6)
C14 0.0219(7) 0.0220(7) 0.0164(7) -0.0034(5) -0.0072(5) -0.0063(6)
C15 0.0228(7) 0.0187(7) 0.0213(7) 0.0016(6) -0.0091(6) -0.0027(6)
 
_geom_special_details
;
 All esds (except the esd in the dihedral angle between two l.s. planes)
 are estimated using the full covariance matrix.  The cell esds are taken
 into account individually in the estimation of esds in distances, angles
 and torsion angles; correlations between esds in cell parameters are only
 used when they are defined by crystal symmetry.  An approximate (isotropic)
 treatment of cell esds is used for estimating esds involving l.s. planes.
;
 
loop_
 _geom_bond_atom_site_label_1
 _geom_bond_atom_site_label_2
 _geom_bond_distance
 _geom_bond_site_symmetry_2
 _geom_bond_publ_flag
Cu1 O1 1.9376(10) 2 ?
Cu1 O1 1.9376(10) . ?
Cu1 N1 1.9516(12) 2 ?
Cu1 N1 1.9516(12) . ?
O1 C2 1.3187(18) . ?
N1 C9 1.3277(19) . ?
N1 C1 1.3568(19) . ?
N2 C10 1.146(2) . ?
N3 C15 1.150(2) . ?
C1 C6 1.414(2) . ?
C1 C2 1.4345(19) . ?
C2 C3 1.388(2) . ?
C3 C4 1.408(2) . ?
C3 H3 0.9300 . ?
C4 C5 1.378(2) . ?
C4 H4 0.9300 . ?
C5 C6 1.413(2) . ?
C5 H5 0.9300 . ?
C6 C7 1.416(2) . ?
C7 C8 1.372(2) . ?
C7 H7 0.9300 . ?
C8 C9 1.406(2) . ?
C8 H8 0.9300 . ?
C9 H9 0.9300 . ?
C10 C11 1.438(2) . ?
C11 C12 1.379(2) . ?
C11 C15 1.432(2) . ?
C12 C13 1.440(2) . ?
C12 C14 1.451(2) . ?
C13 C14 1.351(2) 2_655 ?
C13 H13 0.9300 . ?
C14 C13 1.351(2) 2_655 ?
C14 H14 0.9300 . ?
 
loop_
 _geom_angle_atom_site_label_1
 _geom_angle_atom_site_label_2
 _geom_angle_atom_site_label_3
 _geom_angle
 _geom_angle_site_symmetry_1
 _geom_angle_site_symmetry_3
 _geom_angle_publ_flag
O1 Cu1 O1 180.00(6) 2 . ?
O1 Cu1 N1 84.61(5) 2 2 ?
O1 Cu1 N1 95.39(5) . 2 ?
O1 Cu1 N1 95.39(5) 2 . ?
O1 Cu1 N1 84.61(5) . . ?
N1 Cu1 N1 180.00(9) 2 . ?
C2 O1 Cu1 111.67(9) . . ?
C9 N1 C1 119.58(12) . . ?
C9 N1 Cu1 129.24(10) . . ?
C1 N1 Cu1 111.18(9) . . ?
N1 C1 C6 122.55(13) . . ?
N1 C1 C2 114.93(12) . . ?
C6 C1 C2 122.52(13) . . ?
O1 C2 C3 125.46(13) . . ?
O1 C2 C1 117.58(12) . . ?
C3 C2 C1 116.96(13) . . ?
C2 C3 C4 120.69(13) . . ?
C2 C3 H3 119.7 . . ?
C4 C3 H3 119.7 . . ?
C5 C4 C3 122.22(13) . . ?
C5 C4 H4 118.9 . . ?
C3 C4 H4 118.9 . . ?
C4 C5 C6 119.46(13) . . ?
C4 C5 H5 120.3 . . ?
C6 C5 H5 120.3 . . ?
C5 C6 C1 118.14(13) . . ?
C5 C6 C7 125.37(13) . . ?
C1 C6 C7 116.48(13) . . ?
C8 C7 C6 120.27(14) . . ?
C8 C7 H7 119.9 . . ?
C6 C7 H7 119.9 . . ?
C7 C8 C9 119.28(14) . . ?
C7 C8 H8 120.4 . . ?
C9 C8 H8 120.4 . . ?
N1 C9 C8 121.84(14) . . ?
N1 C9 H9 119.1 . . ?
C8 C9 H9 119.1 . . ?
N2 C10 C11 179.30(18) . . ?
C12 C11 C15 121.60(14) . . ?
C12 C11 C10 122.08(13) . . ?
C15 C11 C10 116.28(13) . . ?
C11 C12 C13 121.12(13) . . ?
C11 C12 C14 120.96(14) . . ?
C13 C12 C14 117.92(13) . . ?
C14 C13 C12 121.31(14) 2_655 . ?
C14 C13 H13 119.3 2_655 . ?
C12 C13 H13 119.3 . . ?
C13 C14 C12 120.78(14) 2_655 . ?
C13 C14 H14 119.6 2_655 . ?
C12 C14 H14 119.6 . . ?
N3 C15 C11 178.80(17) . . ?
 
_diffrn_measured_fraction_theta_max    0.996
_diffrn_reflns_theta_full              26.53
_diffrn_measured_fraction_theta_full   0.996
_refine_diff_density_max    0.382
_refine_diff_density_min   -0.248
_refine_diff_density_rms    0.058
#===END
 
data_FormII150K
 
_audit_creation_method            SHELXL-97
_chemical_name_systematic
;
 ?
;
_chemical_name_common             ?
_chemical_melting_point           ?
_chemical_formula_moiety          'C18 H12 Cu N2 O2, C12 H4 N4'
_chemical_formula_sum
 'C30 H16 Cu N6 O2'
_chemical_formula_weight          556.03
 
loop_
 _atom_type_symbol
 _atom_type_description
 _atom_type_scat_dispersion_real
 _atom_type_scat_dispersion_imag
 _atom_type_scat_source
 'C'  'C'   0.0033   0.0016
 'International Tables Vol C Tables 4.2.6.8 and 6.1.1.4'
 'H'  'H'   0.0000   0.0000
 'International Tables Vol C Tables 4.2.6.8 and 6.1.1.4'
 'N'  'N'   0.0061   0.0033
 'International Tables Vol C Tables 4.2.6.8 and 6.1.1.4'
 'O'  'O'   0.0106   0.0060
 'International Tables Vol C Tables 4.2.6.8 and 6.1.1.4'
 'Cu'  'Cu'   0.3201   1.2651
 'International Tables Vol C Tables 4.2.6.8 and 6.1.1.4'
 
_symmetry_cell_setting           'Triclinic'
_symmetry_space_group_name_H-M   'P-1   '
_symmetry_space_group_name_Hall '-P 1' 
loop_
 _symmetry_equiv_pos_as_xyz
 'x, y, z'
 '-x, -y, -z'
 
_cell_length_a                    7.9746(11)
_cell_length_b                    8.2474(11)
_cell_length_c                    9.7454(13)
_cell_angle_alpha                 77.4280(10)
_cell_angle_beta                  73.1560(10)
_cell_angle_gamma                 77.7960(10)
_cell_volume                      591.15(14)
_cell_formula_units_Z             1
_cell_measurement_temperature     150(2)
_cell_measurement_reflns_used    5195
_cell_measurement_theta_min        2.21
_cell_measurement_theta_max       26.60
 
_exptl_crystal_description       'plate'
_exptl_crystal_colour            'black'
_exptl_crystal_size_max           0.50
_exptl_crystal_size_mid           0.33
_exptl_crystal_size_min           0.07
_exptl_crystal_density_meas       ?
_exptl_crystal_density_diffrn     1.562
_exptl_crystal_density_method     'not measured'
_exptl_crystal_F_000              283
_exptl_absorpt_coefficient_mu     0.967
_exptl_absorpt_correction_type    'multi-scan'
_exptl_absorpt_correction_T_min   0.6460
_exptl_absorpt_correction_T_max   0.9354
_exptl_absorpt_process_details     'APEX2 Software Suite (Bruker,2009)'  
 
_exptl_special_details
;
 ?
;
 
_diffrn_ambient_temperature       150(2)
_diffrn_radiation_wavelength      0.71073
_diffrn_radiation_type            MoK\a
_diffrn_radiation_source          'fine-focus sealed tube'
_diffrn_radiation_monochromator   graphite
_diffrn_measurement_device_type  'Bruker APEX-II CCD'
_diffrn_measurement_method       '\f and \w scans'
_diffrn_detector_area_resol_mean  ?
_diffrn_standards_number          ?
_diffrn_standards_interval_count  ?
_diffrn_standards_interval_time   ?
_diffrn_standards_decay_%         ?
_diffrn_reflns_number             6511
_diffrn_reflns_av_R_equivalents   0.0160
_diffrn_reflns_av_sigmaI/netI     0.0171
_diffrn_reflns_limit_h_min        -9
_diffrn_reflns_limit_h_max        9
_diffrn_reflns_limit_k_min        -10
_diffrn_reflns_limit_k_max        10
_diffrn_reflns_limit_l_min        -12
_diffrn_reflns_limit_l_max        12
_diffrn_reflns_theta_min          2.21
_diffrn_reflns_theta_max          26.60
_reflns_number_total              2462
_reflns_number_gt                 2425
_reflns_threshold_expression      >2sigma(I)
 
_computing_data_collection      'Bruker APEX2'
_computing_cell_refinement      'Bruker SAINT'
_computing_data_reduction       'Bruker SAINT'  
_computing_structure_solution   'SHELXS-97 (Sheldrick, 2008)'
_computing_structure_refinement 'SHELXL-97 (Sheldrick, 2008)'
_computing_molecular_graphics   'Bruker SHELXTL'
_computing_publication_material 'Bruker SHELXTL'
 
_refine_special_details
;
 Refinement of F^2^ against ALL reflections.  The weighted R-factor wR and
 goodness of fit S are based on F^2^, conventional R-factors R are based
 on F, with F set to zero for negative F^2^. The threshold expression of
 F^2^ > 2sigma(F^2^) is used only for calculating R-factors(gt) etc. and is
 not relevant to the choice of reflections for refinement.  R-factors based
 on F^2^ are statistically about twice as large as those based on F, and R-
 factors based on ALL data will be even larger.
;
 
_refine_ls_structure_factor_coef  Fsqd
_refine_ls_matrix_type            full
_refine_ls_weighting_scheme       calc
_refine_ls_weighting_details
 'calc w=1/[\s^2^(Fo^2^)+(0.0279P)^2^+0.3521P] where P=(Fo^2^+2Fc^2^)/3'
_atom_sites_solution_primary      direct
_atom_sites_solution_secondary    difmap
_atom_sites_solution_hydrogens    geom
_refine_ls_hydrogen_treatment     constr
_refine_ls_extinction_method      none
_refine_ls_extinction_coef        ?
_refine_ls_number_reflns          2462
_refine_ls_number_parameters      178
_refine_ls_number_restraints      0
_refine_ls_R_factor_all           0.0231
_refine_ls_R_factor_gt            0.0228
_refine_ls_wR_factor_ref          0.0623
_refine_ls_wR_factor_gt           0.0622
_refine_ls_goodness_of_fit_ref    1.049
_refine_ls_restrained_S_all       1.049
_refine_ls_shift/su_max           0.015
_refine_ls_shift/su_mean          0.002
 
loop_
 _atom_site_label
 _atom_site_type_symbol
 _atom_site_fract_x
 _atom_site_fract_y
 _atom_site_fract_z
 _atom_site_U_iso_or_equiv
 _atom_site_adp_type
 _atom_site_occupancy
 _atom_site_symmetry_multiplicity
 _atom_site_calc_flag
 _atom_site_refinement_flags
 _atom_site_disorder_assembly
 _atom_site_disorder_group
Cu1 Cu 0.0000 0.0000 0.0000 0.01869(9) Uani 1 2 d S . .
O1 O -0.07725(15) -0.09211(12) -0.13372(11) 0.0240(2) Uani 1 1 d . . .
N1 N 0.3025(2) 0.20500(19) 0.57663(16) 0.0357(3) Uani 1 1 d . . .
N2 N 0.3893(2) 0.57462(19) 0.80193(18) 0.0393(4) Uani 1 1 d . . .
N3 N 0.05799(16) -0.21648(15) 0.11928(13) 0.0194(2) Uani 1 1 d . . .
C1 C 0.3474(2) 0.23187(19) 0.66992(17) 0.0254(3) Uani 1 1 d . . .
C2 C 0.4014(2) 0.26302(19) 0.78851(16) 0.0228(3) Uani 1 1 d . . .
C3 C 0.45031(19) 0.13361(18) 0.89269(16) 0.0215(3) Uani 1 1 d . . .
C4 C 0.5029(2) 0.16634(19) 1.01219(16) 0.0236(3) Uani 1 1 d . . .
H4 H 0.5044 0.2768 1.0189 0.028 Uiso 1 1 calc R . .
C5 C 0.4499(2) -0.04021(19) 0.88544(16) 0.0231(3) Uani 1 1 d . . .
H5 H 0.4168 -0.0649 0.8093 0.028 Uiso 1 1 calc R . .
C6 C 0.3959(2) 0.4365(2) 0.79545(17) 0.0259(3) Uani 1 1 d . . .
C7 C -0.12393(18) 0.02616(18) -0.23705(15) 0.0193(3) Uani 1 1 d . . .
C8 C 0.11626(18) -0.19660(17) 0.23152(15) 0.0180(3) Uani 1 1 d . . .
C9 C 0.0468(2) -0.36950(19) 0.10428(17) 0.0250(3) Uani 1 1 d . . .
H9 H 0.0074 -0.3822 0.0268 0.030 Uiso 1 1 calc R . .
C10 C 0.0929(2) -0.51314(19) 0.20214(19) 0.0301(3) Uani 1 1 d . . .
H10 H 0.0835 -0.6192 0.1897 0.036 Uiso 1 1 calc R . .
C11 C 0.1519(2) -0.49531(19) 0.31591(17) 0.0270(3) Uani 1 1 d . . .
H11 H 0.1831 -0.5898 0.3809 0.032 Uiso 1 1 calc R . .
C12 C 0.16554(19) -0.33370(18) 0.33520(16) 0.0212(3) Uani 1 1 d . . .
C13 C 0.2234(2) -0.2996(2) 0.44850(16) 0.0245(3) Uani 1 1 d . . .
H13 H 0.2580 -0.3871 0.5178 0.029 Uiso 1 1 calc R . .
C14 C -0.2280(2) 0.1356(2) -0.45532(16) 0.0241(3) Uani 1 1 d . . .
H14 H -0.2635 0.1140 -0.5316 0.029 Uiso 1 1 calc R . .
C15 C -0.1811(2) -0.00018(19) -0.35092(16) 0.0228(3) Uani 1 1 d . . .
H15 H -0.1883 -0.1089 -0.3583 0.027 Uiso 1 1 calc R . .
 
loop_
 _atom_site_aniso_label
 _atom_site_aniso_U_11
 _atom_site_aniso_U_22
 _atom_site_aniso_U_33
 _atom_site_aniso_U_23
 _atom_site_aniso_U_13
 _atom_site_aniso_U_12
Cu1 0.02441(14) 0.01421(13) 0.01988(14) -0.00004(9) -0.01176(10) -0.00264(9)
O1 0.0343(6) 0.0161(5) 0.0253(5) -0.0010(4) -0.0163(5) -0.0026(4)
N1 0.0450(9) 0.0350(8) 0.0326(8) -0.0013(6) -0.0218(7) -0.0060(7)
N2 0.0485(9) 0.0283(8) 0.0428(9) -0.0068(6) -0.0161(7) -0.0029(7)
N3 0.0228(6) 0.0167(6) 0.0203(6) -0.0012(5) -0.0094(5) -0.0034(5)
C1 0.0277(8) 0.0230(7) 0.0253(8) 0.0018(6) -0.0116(6) -0.0030(6)
C2 0.0228(7) 0.0249(7) 0.0215(7) -0.0022(6) -0.0077(6) -0.0043(6)
C3 0.0207(7) 0.0240(7) 0.0201(7) -0.0017(6) -0.0062(5) -0.0051(5)
C4 0.0275(8) 0.0225(7) 0.0229(7) -0.0038(6) -0.0077(6) -0.0063(6)
C5 0.0266(7) 0.0267(7) 0.0195(7) -0.0042(6) -0.0090(6) -0.0072(6)
C6 0.0273(8) 0.0278(8) 0.0227(7) -0.0013(6) -0.0103(6) -0.0020(6)
C7 0.0200(7) 0.0185(7) 0.0192(7) -0.0029(5) -0.0060(5) -0.0016(5)
C8 0.0176(6) 0.0188(7) 0.0176(6) -0.0017(5) -0.0053(5) -0.0033(5)
C9 0.0341(8) 0.0203(7) 0.0261(8) -0.0028(6) -0.0164(6) -0.0051(6)
C10 0.0436(9) 0.0167(7) 0.0350(9) -0.0004(6) -0.0188(7) -0.0072(6)
C11 0.0351(8) 0.0191(7) 0.0279(8) 0.0046(6) -0.0151(7) -0.0051(6)
C12 0.0219(7) 0.0211(7) 0.0200(7) 0.0004(5) -0.0063(5) -0.0044(5)
C13 0.0278(8) 0.0263(7) 0.0187(7) 0.0021(6) -0.0095(6) -0.0042(6)
C14 0.0264(7) 0.0309(8) 0.0175(7) -0.0060(6) -0.0087(6) -0.0037(6)
C15 0.0261(7) 0.0207(7) 0.0230(7) -0.0065(6) -0.0072(6) -0.0030(6)
 
_geom_special_details
;
 All esds (except the esd in the dihedral angle between two l.s. planes)
 are estimated using the full covariance matrix.  The cell esds are taken
 into account individually in the estimation of esds in distances, angles
 and torsion angles; correlations between esds in cell parameters are only
 used when they are defined by crystal symmetry.  An approximate (isotropic)
 treatment of cell esds is used for estimating esds involving l.s. planes.
;
 
loop_
 _geom_bond_atom_site_label_1
 _geom_bond_atom_site_label_2
 _geom_bond_distance
 _geom_bond_site_symmetry_2
 _geom_bond_publ_flag
Cu1 O1 1.9362(10) 2 ?
Cu1 O1 1.9362(10) . ?
Cu1 N3 1.9524(12) 2 ?
Cu1 N3 1.9524(12) . ?
O1 C7 1.3191(17) . ?
N1 C1 1.146(2) . ?
N2 C6 1.144(2) . ?
N3 C9 1.3256(19) . ?
N3 C8 1.3579(18) . ?
C1 C2 1.432(2) . ?
C2 C3 1.380(2) . ?
C2 C6 1.438(2) . ?
C3 C4 1.440(2) . ?
C3 C5 1.451(2) . ?
C4 C5 1.349(2) 2_657 ?
C4 H4 0.9300 . ?
C5 C4 1.349(2) 2_657 ?
C5 H5 0.9300 . ?
C7 C15 1.388(2) . ?
C7 C8 1.4332(19) 2 ?
C8 C12 1.4138(19) . ?
C8 C7 1.4332(19) 2 ?
C9 C10 1.405(2) . ?
C9 H9 0.9300 . ?
C10 C11 1.369(2) . ?
C10 H10 0.9300 . ?
C11 C12 1.416(2) . ?
C11 H11 0.9300 . ?
C12 C13 1.413(2) . ?
C13 C14 1.377(2) 2 ?
C13 H13 0.9300 . ?
C14 C13 1.377(2) 2 ?
C14 C15 1.406(2) . ?
C14 H14 0.9300 . ?
C15 H15 0.9300 . ?
 
loop_
 _geom_angle_atom_site_label_1
 _geom_angle_atom_site_label_2
 _geom_angle_atom_site_label_3
 _geom_angle
 _geom_angle_site_symmetry_1
 _geom_angle_site_symmetry_3
 _geom_angle_publ_flag
O1 Cu1 O1 180.00(3) 2 . ?
O1 Cu1 N3 95.36(5) 2 2 ?
O1 Cu1 N3 84.64(5) . 2 ?
O1 Cu1 N3 84.64(5) 2 . ?
O1 Cu1 N3 95.36(5) . . ?
N3 Cu1 N3 180.00(11) 2 . ?
C7 O1 Cu1 111.68(9) . . ?
C9 N3 C8 119.59(12) . . ?
C9 N3 Cu1 129.33(10) . . ?
C8 N3 Cu1 111.09(9) . . ?
N1 C1 C2 178.83(17) . . ?
C3 C2 C1 121.65(14) . . ?
C3 C2 C6 122.03(14) . . ?
C1 C2 C6 116.29(13) . . ?
C2 C3 C4 121.23(13) . . ?
C2 C3 C5 120.96(14) . . ?
C4 C3 C5 117.81(13) . . ?
C5 C4 C3 121.38(14) 2_657 . ?
C5 C4 H4 119.3 2_657 . ?
C3 C4 H4 119.3 . . ?
C4 C5 C3 120.80(14) 2_657 . ?
C4 C5 H5 119.6 2_657 . ?
C3 C5 H5 119.6 . . ?
N2 C6 C2 179.14(19) . . ?
O1 C7 C15 125.49(13) . . ?
O1 C7 C8 117.60(12) . 2 ?
C15 C7 C8 116.91(13) . 2 ?
N3 C8 C12 122.54(13) . . ?
N3 C8 C7 114.96(12) . 2 ?
C12 C8 C7 122.51(13) . 2 ?
N3 C9 C10 121.83(14) . . ?
N3 C9 H9 119.1 . . ?
C10 C9 H9 119.1 . . ?
C11 C10 C9 119.32(14) . . ?
C11 C10 H10 120.3 . . ?
C9 C10 H10 120.3 . . ?
C10 C11 C12 120.35(14) . . ?
C10 C11 H11 119.8 . . ?
C12 C11 H11 119.8 . . ?
C13 C12 C11 125.46(13) . . ?
C13 C12 C8 118.17(13) . . ?
C11 C12 C8 116.37(13) . . ?
C14 C13 C12 119.39(13) 2 . ?
C14 C13 H13 120.3 2 . ?
C12 C13 H13 120.3 . . ?
C13 C14 C15 122.25(13) 2 . ?
C13 C14 H14 118.9 2 . ?
C15 C14 H14 118.9 . . ?
C7 C15 C14 120.76(13) . . ?
C7 C15 H15 119.6 . . ?
C14 C15 H15 119.6 . . ?
 
_diffrn_measured_fraction_theta_max    0.995
_diffrn_reflns_theta_full              26.60
_diffrn_measured_fraction_theta_full   0.995
_refine_diff_density_max    0.355
_refine_diff_density_min   -0.251
_refine_diff_density_rms    0.053
#===END
 
data_FormII175K
 
_audit_creation_method            SHELXL-97
_chemical_name_systematic
;
 ?
;
_chemical_name_common             ?
_chemical_melting_point           ?
_chemical_formula_moiety          'C18 H12 Cu N2 O2, C12 H4 N4'
_chemical_formula_sum
 'C30 H16 Cu N6 O2'
_chemical_formula_weight          556.03
 
loop_
 _atom_type_symbol
 _atom_type_description
 _atom_type_scat_dispersion_real
 _atom_type_scat_dispersion_imag
 _atom_type_scat_source
 'C'  'C'   0.0033   0.0016
 'International Tables Vol C Tables 4.2.6.8 and 6.1.1.4'
 'H'  'H'   0.0000   0.0000
 'International Tables Vol C Tables 4.2.6.8 and 6.1.1.4'
 'N'  'N'   0.0061   0.0033
 'International Tables Vol C Tables 4.2.6.8 and 6.1.1.4'
 'O'  'O'   0.0106   0.0060
 'International Tables Vol C Tables 4.2.6.8 and 6.1.1.4'
 'Cu'  'Cu'   0.3201   1.2651
 'International Tables Vol C Tables 4.2.6.8 and 6.1.1.4'
 
_symmetry_cell_setting           'Triclinic'
_symmetry_space_group_name_H-M   'P-1   '
_symmetry_space_group_name_Hall   '-P 1   ' 
loop_
 _symmetry_equiv_pos_as_xyz
 'x, y, z'
 '-x, -y, -z'
 
_cell_length_a                    7.9932(9)
_cell_length_b                    8.2504(9)
_cell_length_c                    9.7490(11)
_cell_angle_alpha                 77.3770(10)
_cell_angle_beta                  73.2790(10)
_cell_angle_gamma                 77.9000(10)
_cell_volume                      593.40(11)
_cell_formula_units_Z             1
_cell_measurement_temperature     175(2)
_cell_measurement_reflns_used    5054
_cell_measurement_theta_min        2.21
_cell_measurement_theta_max       26.52
 
_exptl_crystal_description       'plate'
_exptl_crystal_colour            'black'
_exptl_crystal_size_max           0.50
_exptl_crystal_size_mid           0.33
_exptl_crystal_size_min           0.07
_exptl_crystal_density_meas       ?
_exptl_crystal_density_diffrn     1.556
_exptl_crystal_density_method     'not measured'
_exptl_crystal_F_000              283
_exptl_absorpt_coefficient_mu     0.964
_exptl_absorpt_correction_type    'multi-scan'
_exptl_absorpt_correction_T_min   0.6470
_exptl_absorpt_correction_T_max   0.9356
_exptl_absorpt_process_details     'APEX2 Software Suite (Bruker,2009)'
 
_exptl_special_details
;
 ?
;
 
_diffrn_ambient_temperature       175(2)
_diffrn_radiation_wavelength      0.71073
_diffrn_radiation_type            MoK\a
_diffrn_radiation_source          'fine-focus sealed tube'
_diffrn_radiation_monochromator   graphite
_diffrn_measurement_device_type  'Bruker APEX-II CCD'
_diffrn_measurement_method       '\f and \w scans'
_diffrn_detector_area_resol_mean  ?
_diffrn_standards_number          ?
_diffrn_standards_interval_count  ?
_diffrn_standards_interval_time   ?
_diffrn_standards_decay_%         ?
_diffrn_reflns_number             6522
_diffrn_reflns_av_R_equivalents   0.0159
_diffrn_reflns_av_sigmaI/netI     0.0170
_diffrn_reflns_limit_h_min        -9
_diffrn_reflns_limit_h_max        9
_diffrn_reflns_limit_k_min        -10
_diffrn_reflns_limit_k_max        10
_diffrn_reflns_limit_l_min        -12
_diffrn_reflns_limit_l_max        12
_diffrn_reflns_theta_min          2.21
_diffrn_reflns_theta_max          26.52
_reflns_number_total              2448
_reflns_number_gt                 2405
_reflns_threshold_expression      >2sigma(I)
 
_computing_data_collection      'Bruker APEX2'
_computing_cell_refinement      'Bruker SAINT'
_computing_data_reduction       'Bruker SAINT'  
_computing_structure_solution   'SHELXS-97 (Sheldrick, 2008)'
_computing_structure_refinement 'SHELXL-97 (Sheldrick, 2008)'
_computing_molecular_graphics   'Bruker SHELXTL'
_computing_publication_material 'Bruker SHELXTL'
 
_refine_special_details
;
 Refinement of F^2^ against ALL reflections.  The weighted R-factor wR and
 goodness of fit S are based on F^2^, conventional R-factors R are based
 on F, with F set to zero for negative F^2^. The threshold expression of
 F^2^ > 2sigma(F^2^) is used only for calculating R-factors(gt) etc. and is
 not relevant to the choice of reflections for refinement.  R-factors based
 on F^2^ are statistically about twice as large as those based on F, and R-
 factors based on ALL data will be even larger.
;
 
_refine_ls_structure_factor_coef  Fsqd
_refine_ls_matrix_type            full
_refine_ls_weighting_scheme       calc
_refine_ls_weighting_details
 'calc w=1/[\s^2^(Fo^2^)+(0.0326P)^2^+0.2415P] where P=(Fo^2^+2Fc^2^)/3'
_atom_sites_solution_primary      direct
_atom_sites_solution_secondary    difmap
_atom_sites_solution_hydrogens    geom
_refine_ls_hydrogen_treatment     constr
_refine_ls_extinction_method      none
_refine_ls_extinction_coef        ?
_refine_ls_number_reflns          2448
_refine_ls_number_parameters      178
_refine_ls_number_restraints      0
_refine_ls_R_factor_all           0.0242
_refine_ls_R_factor_gt            0.0237
_refine_ls_wR_factor_ref          0.0673
_refine_ls_wR_factor_gt           0.0668
_refine_ls_goodness_of_fit_ref    1.133
_refine_ls_restrained_S_all       1.133
_refine_ls_shift/su_max           0.001
_refine_ls_shift/su_mean          0.000
 
loop_
 _atom_site_label
 _atom_site_type_symbol
 _atom_site_fract_x
 _atom_site_fract_y
 _atom_site_fract_z
 _atom_site_U_iso_or_equiv
 _atom_site_adp_type
 _atom_site_occupancy
 _atom_site_symmetry_multiplicity
 _atom_site_calc_flag
 _atom_site_refinement_flags
 _atom_site_disorder_assembly
 _atom_site_disorder_group
Cu1 Cu 0.0000 0.0000 0.0000 0.02191(9) Uani 1 2 d S . .
O1 O 0.07714(15) 0.09184(13) 0.13366(12) 0.0278(2) Uani 1 1 d . . .
N1 N 0.6102(2) -0.5738(2) 0.19836(19) 0.0460(4) Uani 1 1 d . . .
N2 N 0.6971(2) -0.2051(2) 0.42322(17) 0.0420(4) Uani 1 1 d . . .
N3 N 0.05803(16) -0.21642(15) 0.11927(13) 0.0224(3) Uani 1 1 d . . .
C1 C 0.6039(2) -0.4360(2) 0.20460(18) 0.0306(3) Uani 1 1 d . . .
C2 C 0.5982(2) -0.2625(2) 0.21144(17) 0.0265(3) Uani 1 1 d . . .
C3 C 0.5495(2) -0.13330(19) 0.10742(16) 0.0250(3) Uani 1 1 d . . .
C4 C 0.5501(2) 0.0401(2) 0.11440(17) 0.0271(3) Uani 1 1 d . . .
H4 H 0.5833 0.0648 0.1905 0.032 Uiso 1 1 calc R . .
C5 C 0.4970(2) -0.1661(2) -0.01199(17) 0.0272(3) Uani 1 1 d . . .
H5 H 0.4954 -0.2765 -0.0186 0.033 Uiso 1 1 calc R . .
C6 C 0.6523(2) -0.2316(2) 0.32986(18) 0.0298(3) Uani 1 1 d . . .
C7 C 0.11621(18) -0.19669(18) 0.23141(16) 0.0210(3) Uani 1 1 d . . .
C8 C 0.12370(19) -0.02634(18) 0.23698(16) 0.0222(3) Uani 1 1 d . . .
C9 C 0.1806(2) -0.0001(2) 0.35069(17) 0.0267(3) Uani 1 1 d . . .
H9 H 0.1877 0.1086 0.3581 0.032 Uiso 1 1 calc R . .
C10 C 0.2277(2) -0.1358(2) 0.45498(17) 0.0282(3) Uani 1 1 d . . .
H10 H 0.2632 -0.1142 0.5312 0.034 Uiso 1 1 calc R . .
C11 C 0.2231(2) -0.2996(2) 0.44814(17) 0.0285(3) Uani 1 1 d . . .
H11 H 0.2578 -0.3871 0.5174 0.034 Uiso 1 1 calc R . .
C12 C 0.1653(2) -0.33357(19) 0.33499(16) 0.0246(3) Uani 1 1 d . . .
C13 C 0.1518(2) -0.4951(2) 0.31563(18) 0.0313(4) Uani 1 1 d . . .
H13 H 0.1829 -0.5896 0.3806 0.038 Uiso 1 1 calc R . .
C14 C 0.0931(2) -0.5129(2) 0.2020(2) 0.0351(4) Uani 1 1 d . . .
H14 H 0.0839 -0.6189 0.1895 0.042 Uiso 1 1 calc R . .
C15 C 0.0469(2) -0.3693(2) 0.10426(18) 0.0290(3) Uani 1 1 d . . .
H15 H 0.0075 -0.3819 0.0268 0.035 Uiso 1 1 calc R . .
 
loop_
 _atom_site_aniso_label
 _atom_site_aniso_U_11
 _atom_site_aniso_U_22
 _atom_site_aniso_U_33
 _atom_site_aniso_U_23
 _atom_site_aniso_U_13
 _atom_site_aniso_U_12
Cu1 0.02864(15) 0.01633(14) 0.02358(15) -0.00003(9) -0.01400(10) -0.00276(9)
O1 0.0399(6) 0.0182(5) 0.0300(6) -0.0012(4) -0.0195(5) -0.0029(4)
N1 0.0568(10) 0.0323(9) 0.0510(10) -0.0087(7) -0.0189(8) -0.0028(7)
N2 0.0534(10) 0.0409(9) 0.0384(8) -0.0015(7) -0.0267(7) -0.0065(7)
N3 0.0266(6) 0.0186(6) 0.0242(6) -0.0010(5) -0.0117(5) -0.0036(5)
C1 0.0324(8) 0.0316(9) 0.0280(8) -0.0015(6) -0.0125(7) -0.0026(6)
C2 0.0267(7) 0.0283(8) 0.0255(7) -0.0028(6) -0.0096(6) -0.0042(6)
C3 0.0251(7) 0.0273(8) 0.0230(7) -0.0018(6) -0.0075(6) -0.0055(6)
C4 0.0316(8) 0.0304(8) 0.0238(7) -0.0044(6) -0.0119(6) -0.0083(6)
C5 0.0323(8) 0.0252(7) 0.0266(8) -0.0040(6) -0.0099(6) -0.0073(6)
C6 0.0331(8) 0.0270(8) 0.0297(8) 0.0022(6) -0.0146(7) -0.0034(6)
C7 0.0210(7) 0.0213(7) 0.0210(7) -0.0019(5) -0.0069(5) -0.0032(5)
C8 0.0232(7) 0.0205(7) 0.0231(7) -0.0029(5) -0.0075(5) -0.0019(5)
C9 0.0315(8) 0.0239(7) 0.0268(8) -0.0074(6) -0.0094(6) -0.0028(6)
C10 0.0315(8) 0.0349(8) 0.0212(7) -0.0066(6) -0.0108(6) -0.0037(6)
C11 0.0332(8) 0.0297(8) 0.0221(7) 0.0031(6) -0.0121(6) -0.0047(6)
C12 0.0258(7) 0.0243(7) 0.0229(7) 0.0008(6) -0.0080(6) -0.0048(6)
C13 0.0419(9) 0.0216(7) 0.0323(8) 0.0054(6) -0.0187(7) -0.0065(6)
C14 0.0519(10) 0.0186(7) 0.0405(9) -0.0004(7) -0.0228(8) -0.0074(7)
C15 0.0404(9) 0.0225(7) 0.0308(8) -0.0028(6) -0.0199(7) -0.0061(6)
 
_geom_special_details
;
 All esds (except the esd in the dihedral angle between two l.s. planes)
 are estimated using the full covariance matrix.  The cell esds are taken
 into account individually in the estimation of esds in distances, angles
 and torsion angles; correlations between esds in cell parameters are only
 used when they are defined by crystal symmetry.  An approximate (isotropic)
 treatment of cell esds is used for estimating esds involving l.s. planes.
;
 
loop_
 _geom_bond_atom_site_label_1
 _geom_bond_atom_site_label_2
 _geom_bond_distance
 _geom_bond_site_symmetry_2
 _geom_bond_publ_flag
Cu1 O1 1.9344(10) 2 ?
Cu1 O1 1.9344(10) . ?
Cu1 N3 1.9522(12) . ?
Cu1 N3 1.9522(12) 2 ?
O1 C8 1.3184(18) . ?
N1 C1 1.142(2) . ?
N2 C6 1.145(2) . ?
N3 C15 1.325(2) . ?
N3 C7 1.3564(19) . ?
C1 C2 1.438(2) . ?
C2 C3 1.377(2) . ?
C2 C6 1.430(2) . ?
C3 C5 1.439(2) . ?
C3 C4 1.448(2) . ?
C4 C5 1.348(2) 2_655 ?
C4 H4 0.9300 . ?
C5 C4 1.348(2) 2_655 ?
C5 H5 0.9300 . ?
C7 C12 1.412(2) . ?
C7 C8 1.433(2) . ?
C8 C9 1.385(2) . ?
C9 C10 1.405(2) . ?
C9 H9 0.9300 . ?
C10 C11 1.377(2) . ?
C10 H10 0.9300 . ?
C11 C12 1.411(2) . ?
C11 H11 0.9300 . ?
C12 C13 1.416(2) . ?
C13 C14 1.367(2) . ?
C13 H13 0.9300 . ?
C14 C15 1.404(2) . ?
C14 H14 0.9300 . ?
C15 H15 0.9300 . ?
 
loop_
 _geom_angle_atom_site_label_1
 _geom_angle_atom_site_label_2
 _geom_angle_atom_site_label_3
 _geom_angle
 _geom_angle_site_symmetry_1
 _geom_angle_site_symmetry_3
 _geom_angle_publ_flag
O1 Cu1 O1 180.00(6) 2 . ?
O1 Cu1 N3 95.40(5) 2 . ?
O1 Cu1 N3 84.60(5) . . ?
O1 Cu1 N3 84.60(5) 2 2 ?
O1 Cu1 N3 95.40(5) . 2 ?
N3 Cu1 N3 180.00(9) . 2 ?
C8 O1 Cu1 111.71(9) . . ?
C15 N3 C7 119.56(12) . . ?
C15 N3 Cu1 129.32(11) . . ?
C7 N3 Cu1 111.12(9) . . ?
N1 C1 C2 179.3(2) . . ?
C3 C2 C6 121.69(14) . . ?
C3 C2 C1 122.10(14) . . ?
C6 C2 C1 116.17(14) . . ?
C2 C3 C5 121.17(14) . . ?
C2 C3 C4 121.03(14) . . ?
C5 C3 C4 117.80(14) . . ?
C5 C4 C3 120.84(14) 2_655 . ?
C5 C4 H4 119.6 2_655 . ?
C3 C4 H4 119.6 . . ?
C4 C5 C3 121.36(14) 2_655 . ?
C4 C5 H5 119.3 2_655 . ?
C3 C5 H5 119.3 . . ?
N2 C6 C2 178.95(19) . . ?
N3 C7 C12 122.56(13) . . ?
N3 C7 C8 114.92(12) . . ?
C12 C7 C8 122.52(13) . . ?
O1 C8 C9 125.51(13) . . ?
O1 C8 C7 117.60(13) . . ?
C9 C8 C7 116.89(13) . . ?
C8 C9 C10 120.79(14) . . ?
C8 C9 H9 119.6 . . ?
C10 C9 H9 119.6 . . ?
C11 C10 C9 122.22(14) . . ?
C11 C10 H10 118.9 . . ?
C9 C10 H10 118.9 . . ?
C10 C11 C12 119.37(14) . . ?
C10 C11 H11 120.3 . . ?
C12 C11 H11 120.3 . . ?
C11 C12 C7 118.19(14) . . ?
C11 C12 C13 125.45(14) . . ?
C7 C12 C13 116.36(14) . . ?
C14 C13 C12 120.37(14) . . ?
C14 C13 H13 119.8 . . ?
C12 C13 H13 119.8 . . ?
C13 C14 C15 119.31(14) . . ?
C13 C14 H14 120.3 . . ?
C15 C14 H14 120.3 . . ?
N3 C15 C14 121.84(14) . . ?
N3 C15 H15 119.1 . . ?
C14 C15 H15 119.1 . . ?
 
_diffrn_measured_fraction_theta_max    0.995
_diffrn_reflns_theta_full              26.52
_diffrn_measured_fraction_theta_full   0.995
_refine_diff_density_max    0.318
_refine_diff_density_min   -0.262
_refine_diff_density_rms    0.060

 
data_FormII200K
 
_audit_creation_method            SHELXL-97
_chemical_name_systematic
;
 ?
;
_chemical_name_common             ?
_chemical_melting_point           ?
_chemical_formula_moiety         'C18 H12 Cu N2 O2, C12 H4 N4'
_chemical_formula_sum
 'C30 H16 Cu N6 O2'
_chemical_formula_weight          556.03
 
loop_
 _atom_type_symbol
 _atom_type_description
 _atom_type_scat_dispersion_real
 _atom_type_scat_dispersion_imag
 _atom_type_scat_source
 'C'  'C'   0.0033   0.0016
 'International Tables Vol C Tables 4.2.6.8 and 6.1.1.4'
 'H'  'H'   0.0000   0.0000
 'International Tables Vol C Tables 4.2.6.8 and 6.1.1.4'
 'N'  'N'   0.0061   0.0033
 'International Tables Vol C Tables 4.2.6.8 and 6.1.1.4'
 'O'  'O'   0.0106   0.0060
 'International Tables Vol C Tables 4.2.6.8 and 6.1.1.4'
 'Cu'  'Cu'   0.3201   1.2651
 'International Tables Vol C Tables 4.2.6.8 and 6.1.1.4'
 
_symmetry_cell_setting           'Triclinic'
_symmetry_space_group_name_H-M   'P-1   '
_symmetry_space_group_name_Hall   '-P 1   '
 
loop_
 _symmetry_equiv_pos_as_xyz
 'x, y, z'
 '-x, -y, -z'
 
_cell_length_a                    8.0146(9)
_cell_length_b                    8.2576(9)
_cell_length_c                    9.7583(10)
_cell_angle_alpha                 77.3240(10)
_cell_angle_beta                  73.4180(10)
_cell_angle_gamma                 78.0170(10)
_cell_volume                      596.57(11)
_cell_formula_units_Z             1
_cell_measurement_temperature     200(2)
_cell_measurement_reflns_used    4869
_cell_measurement_theta_min        2.21
_cell_measurement_theta_max       26.53
 
_exptl_crystal_description       'plate'
_exptl_crystal_colour            'black'
_exptl_crystal_size_max           0.50
_exptl_crystal_size_mid           0.33
_exptl_crystal_size_min           0.07
_exptl_crystal_density_meas       ?
_exptl_crystal_density_diffrn     1.548
_exptl_crystal_density_method     'not measured'
_exptl_crystal_F_000              283
_exptl_absorpt_coefficient_mu     0.958
_exptl_absorpt_correction_type    'multi-scan'
_exptl_absorpt_correction_T_min   0.6484
_exptl_absorpt_correction_T_max   0.9359
_exptl_absorpt_process_details   'APEX2 Software Suite (Bruker,2009)'
 
_exptl_special_details
;
 ?
;
 
_diffrn_ambient_temperature       200(2)
_diffrn_radiation_wavelength      0.71073
_diffrn_radiation_type            MoK\a
_diffrn_radiation_source          'fine-focus sealed tube'
_diffrn_radiation_monochromator   graphite
_diffrn_measurement_device_type  'Bruker APEX-II CCD'
_diffrn_measurement_method       '\f and \w scans'
_diffrn_detector_area_resol_mean  ?
_diffrn_standards_number          ?
_diffrn_standards_interval_count  ?
_diffrn_standards_interval_time   ?
_diffrn_standards_decay_%         ?
_diffrn_reflns_number             6561
_diffrn_reflns_av_R_equivalents   0.0189
_diffrn_reflns_av_sigmaI/netI     0.0182
_diffrn_reflns_limit_h_min        -9
_diffrn_reflns_limit_h_max        9
_diffrn_reflns_limit_k_min        -10
_diffrn_reflns_limit_k_max        10
_diffrn_reflns_limit_l_min        -12
_diffrn_reflns_limit_l_max        12
_diffrn_reflns_theta_min          2.21
_diffrn_reflns_theta_max          26.53
_reflns_number_total              2469
_reflns_number_gt                 2423
_reflns_threshold_expression      >2sigma(I)
 
_computing_data_collection      'Bruker APEX2'
_computing_cell_refinement      'Bruker SAINT'
_computing_data_reduction       'Bruker SAINT'  
_computing_structure_solution   'SHELXS-97 (Sheldrick, 2008)'
_computing_structure_refinement 'SHELXL-97 (Sheldrick, 2008)'
_computing_molecular_graphics   'Bruker SHELXTL'
_computing_publication_material 'Bruker SHELXTL'
 
_refine_special_details
;
 Refinement of F^2^ against ALL reflections.  The weighted R-factor wR and
 goodness of fit S are based on F^2^, conventional R-factors R are based
 on F, with F set to zero for negative F^2^. The threshold expression of
 F^2^ > 2sigma(F^2^) is used only for calculating R-factors(gt) etc. and is
 not relevant to the choice of reflections for refinement.  R-factors based
 on F^2^ are statistically about twice as large as those based on F, and R-
 factors based on ALL data will be even larger.
;
 
_refine_ls_structure_factor_coef  Fsqd
_refine_ls_matrix_type            full
_refine_ls_weighting_scheme       calc
_refine_ls_weighting_details
 'calc w=1/[\s^2^(Fo^2^)+(0.0492P)^2^+0.2059P] where P=(Fo^2^+2Fc^2^)/3'
_atom_sites_solution_primary      direct
_atom_sites_solution_secondary    difmap
_atom_sites_solution_hydrogens    geom
_refine_ls_hydrogen_treatment     constr
_refine_ls_extinction_method      none
_refine_ls_extinction_coef        ?
_refine_ls_number_reflns          2469
_refine_ls_number_parameters      178
_refine_ls_number_restraints      0
_refine_ls_R_factor_all           0.0254
_refine_ls_R_factor_gt            0.0248
_refine_ls_wR_factor_ref          0.0740
_refine_ls_wR_factor_gt           0.0733
_refine_ls_goodness_of_fit_ref    1.006
_refine_ls_restrained_S_all       1.006
_refine_ls_shift/su_max           0.001
_refine_ls_shift/su_mean          0.000
 
loop_
 _atom_site_label
 _atom_site_type_symbol
 _atom_site_fract_x
 _atom_site_fract_y
 _atom_site_fract_z
 _atom_site_U_iso_or_equiv
 _atom_site_adp_type
 _atom_site_occupancy
 _atom_site_symmetry_multiplicity
 _atom_site_calc_flag
 _atom_site_refinement_flags
 _atom_site_disorder_assembly
 _atom_site_disorder_group
Cu1 Cu 1.0000 0.0000 0.0000 0.02524(10) Uani 1 2 d S . .
O1 O 0.92315(16) -0.09153(13) -0.13378(12) 0.0321(2) Uani 1 1 d . . .
N1 N 0.94188(16) 0.21646(15) -0.11920(14) 0.0257(3) Uani 1 1 d . . .
N2 N 0.6098(3) 0.4270(2) 0.1985(2) 0.0531(4) Uani 1 1 d . . .
N3 N 0.6971(2) 0.7949(2) 0.42290(18) 0.0486(4) Uani 1 1 d . . .
C1 C 0.88393(18) 0.19685(18) -0.23123(16) 0.0241(3) Uani 1 1 d . . .
C2 C 0.87649(19) 0.02652(19) -0.23697(16) 0.0254(3) Uani 1 1 d . . .
C3 C 0.8197(2) 0.0001(2) -0.35046(17) 0.0308(3) Uani 1 1 d . . .
H3 H 0.8126 -0.1085 -0.3579 0.037 Uiso 1 1 calc R . .
C4 C 0.7726(2) 0.1362(2) -0.45466(17) 0.0324(3) Uani 1 1 d . . .
H4 H 0.7371 0.1149 -0.5309 0.039 Uiso 1 1 calc R . .
C5 C 0.7773(2) 0.2996(2) -0.44771(17) 0.0327(3) Uani 1 1 d . . .
H5 H 0.7428 0.3871 -0.5170 0.039 Uiso 1 1 calc R . .
C6 C 0.8348(2) 0.3336(2) -0.33474(16) 0.0283(3) Uani 1 1 d . . .
C7 C 0.8483(2) 0.4948(2) -0.31528(19) 0.0362(4) Uani 1 1 d . . .
H7 H 0.8172 0.5892 -0.3802 0.043 Uiso 1 1 calc R . .
C8 C 0.9067(3) 0.5125(2) -0.2017(2) 0.0405(4) Uani 1 1 d . . .
H8 H 0.9158 0.6185 -0.1892 0.049 Uiso 1 1 calc R . .
C9 C 0.9527(2) 0.3693(2) -0.10408(18) 0.0335(3) Uani 1 1 d . . .
H9 H 0.9919 0.3819 -0.0266 0.040 Uiso 1 1 calc R . .
C10 C 0.6035(2) 0.5647(2) 0.20475(18) 0.0353(4) Uani 1 1 d . . .
C11 C 0.5980(2) 0.7378(2) 0.21145(17) 0.0304(3) Uani 1 1 d . . .
C12 C 0.5495(2) 0.8669(2) 0.10738(16) 0.0288(3) Uani 1 1 d . . .
C13 C 0.4970(2) 0.8339(2) -0.01176(17) 0.0311(3) Uani 1 1 d . . .
H13 H 0.4955 0.7236 -0.0182 0.037 Uiso 1 1 calc R . .
C14 C 0.4499(2) 0.9598(2) -0.11439(17) 0.0311(3) Uani 1 1 d . . .
H14 H 0.4167 0.9350 -0.1904 0.037 Uiso 1 1 calc R . .
C15 C 0.6520(2) 0.7688(2) 0.32975(18) 0.0344(4) Uani 1 1 d . . .
 
loop_
 _atom_site_aniso_label
 _atom_site_aniso_U_11
 _atom_site_aniso_U_22
 _atom_site_aniso_U_33
 _atom_site_aniso_U_23
 _atom_site_aniso_U_13
 _atom_site_aniso_U_12
Cu1 0.03304(16) 0.01875(14) 0.02712(15) -0.00008(9) -0.01616(10) -0.00302(9)
O1 0.0468(6) 0.0202(5) 0.0350(6) -0.0014(4) -0.0231(5) -0.0031(4)
N1 0.0313(6) 0.0209(6) 0.0274(6) -0.0011(5) -0.0138(5) -0.0036(5)
N2 0.0668(11) 0.0357(9) 0.0593(11) -0.0090(8) -0.0230(9) -0.0025(8)
N3 0.0629(10) 0.0474(10) 0.0440(9) -0.0024(7) -0.0317(8) -0.0070(8)
C1 0.0246(7) 0.0239(7) 0.0241(7) -0.0020(5) -0.0082(5) -0.0039(5)
C2 0.0269(7) 0.0235(7) 0.0261(7) -0.0038(5) -0.0086(5) -0.0024(5)
C3 0.0370(8) 0.0276(8) 0.0302(8) -0.0081(6) -0.0111(6) -0.0032(6)
C4 0.0368(8) 0.0396(9) 0.0241(7) -0.0074(6) -0.0126(6) -0.0043(7)
C5 0.0379(8) 0.0343(8) 0.0254(7) 0.0026(6) -0.0134(6) -0.0051(7)
C6 0.0307(7) 0.0275(7) 0.0260(7) 0.0012(6) -0.0096(6) -0.0055(6)
C7 0.0489(9) 0.0241(8) 0.0378(9) 0.0059(6) -0.0217(7) -0.0073(7)
C8 0.0609(11) 0.0207(7) 0.0474(10) -0.0003(7) -0.0283(9) -0.0083(7)
C9 0.0474(9) 0.0248(7) 0.0362(8) -0.0030(6) -0.0238(7) -0.0070(7)
C10 0.0384(9) 0.0348(9) 0.0331(8) -0.0019(7) -0.0148(7) -0.0024(7)
C11 0.0313(7) 0.0325(8) 0.0287(7) -0.0025(6) -0.0115(6) -0.0049(6)
C12 0.0295(7) 0.0307(8) 0.0268(7) -0.0020(6) -0.0089(6) -0.0064(6)
C13 0.0373(8) 0.0288(8) 0.0302(8) -0.0045(6) -0.0117(6) -0.0080(6)
C14 0.0376(8) 0.0337(8) 0.0269(7) -0.0040(6) -0.0142(6) -0.0090(6)
C15 0.0373(8) 0.0323(8) 0.0339(8) 0.0020(7) -0.0166(7) -0.0036(7)
 
_geom_special_details
;
 All esds (except the esd in the dihedral angle between two l.s. planes)
 are estimated using the full covariance matrix.  The cell esds are taken
 into account individually in the estimation of esds in distances, angles
 and torsion angles; correlations between esds in cell parameters are only
 used when they are defined by crystal symmetry.  An approximate (isotropic)
 treatment of cell esds is used for estimating esds involving l.s. planes.
;
 
loop_
 _geom_bond_atom_site_label_1
 _geom_bond_atom_site_label_2
 _geom_bond_distance
 _geom_bond_site_symmetry_2
 _geom_bond_publ_flag
Cu1 O1 1.9339(11) 2_755 ?
Cu1 O1 1.9339(11) . ?
Cu1 N1 1.9535(12) 2_755 ?
Cu1 N1 1.9535(12) . ?
O1 C2 1.3179(18) . ?
N1 C9 1.325(2) . ?
N1 C1 1.3549(19) . ?
N2 C10 1.142(2) . ?
N3 C15 1.144(2) . ?
C1 C6 1.412(2) . ?
C1 C2 1.434(2) . ?
C2 C3 1.384(2) . ?
C3 C4 1.408(2) . ?
C3 H3 0.9300 . ?
C4 C5 1.374(2) . ?
C4 H4 0.9300 . ?
C5 C6 1.409(2) . ?
C5 H5 0.9300 . ?
C6 C7 1.414(2) . ?
C7 C8 1.366(2) . ?
C7 H7 0.9300 . ?
C8 C9 1.402(2) . ?
C8 H8 0.9300 . ?
C9 H9 0.9300 . ?
C10 C11 1.437(2) . ?
C11 C12 1.378(2) . ?
C11 C15 1.430(2) . ?
C12 C13 1.438(2) . ?
C12 C14 1.448(2) 2_675 ?
C13 C14 1.350(2) . ?
C13 H13 0.9300 . ?
C14 C12 1.448(2) 2_675 ?
C14 H14 0.9300 . ?
 
loop_
 _geom_angle_atom_site_label_1
 _geom_angle_atom_site_label_2
 _geom_angle_atom_site_label_3
 _geom_angle
 _geom_angle_site_symmetry_1
 _geom_angle_site_symmetry_3
 _geom_angle_publ_flag
O1 Cu1 O1 180.00(6) 2_755 . ?
O1 Cu1 N1 84.57(5) 2_755 2_755 ?
O1 Cu1 N1 95.43(5) . 2_755 ?
O1 Cu1 N1 95.43(5) 2_755 . ?
O1 Cu1 N1 84.57(5) . . ?
N1 Cu1 N1 180.00(7) 2_755 . ?
C2 O1 Cu1 111.79(9) . . ?
C9 N1 C1 119.53(13) . . ?
C9 N1 Cu1 129.35(11) . . ?
C1 N1 Cu1 111.12(10) . . ?
N1 C1 C6 122.59(13) . . ?
N1 C1 C2 114.96(13) . . ?
C6 C1 C2 122.46(14) . . ?
O1 C2 C3 125.44(14) . . ?
O1 C2 C1 117.52(13) . . ?
C3 C2 C1 117.04(13) . . ?
C2 C3 C4 120.54(14) . . ?
C2 C3 H3 119.7 . . ?
C4 C3 H3 119.7 . . ?
C5 C4 C3 122.31(14) . . ?
C5 C4 H4 118.8 . . ?
C3 C4 H4 118.8 . . ?
C4 C5 C6 119.50(14) . . ?
C4 C5 H5 120.2 . . ?
C6 C5 H5 120.2 . . ?
C5 C6 C1 118.14(14) . . ?
C5 C6 C7 125.56(14) . . ?
C1 C6 C7 116.31(14) . . ?
C8 C7 C6 120.41(14) . . ?
C8 C7 H7 119.8 . . ?
C6 C7 H7 119.8 . . ?
C7 C8 C9 119.35(15) . . ?
C7 C8 H8 120.3 . . ?
C9 C8 H8 120.3 . . ?
N1 C9 C8 121.81(14) . . ?
N1 C9 H9 119.1 . . ?
C8 C9 H9 119.1 . . ?
N2 C10 C11 179.2(2) . . ?
C12 C11 C15 121.65(15) . . ?
C12 C11 C10 122.11(14) . . ?
C15 C11 C10 116.20(14) . . ?
C11 C12 C13 121.07(14) . . ?
C11 C12 C14 120.99(15) . 2_675 ?
C13 C12 C14 117.94(14) . 2_675 ?
C14 C13 C12 121.37(14) . . ?
C14 C13 H13 119.3 . . ?
C12 C13 H13 119.3 . . ?
C13 C14 C12 120.69(15) . 2_675 ?
C13 C14 H14 119.7 . . ?
C12 C14 H14 119.7 2_675 . ?
N3 C15 C11 178.94(19) . . ?
 
_diffrn_measured_fraction_theta_max    0.995
_diffrn_reflns_theta_full              26.53
_diffrn_measured_fraction_theta_full   0.995
_refine_diff_density_max    0.314
_refine_diff_density_min   -0.253
_refine_diff_density_rms    0.061
#===END
 
data_FormI225K
 
_audit_creation_method            SHELXL-97
_chemical_name_systematic
;
 ?
;
_chemical_name_common             ?
_chemical_melting_point           ?
_chemical_formula_moiety          'C18 H12 Cu N2 O2, C12 H4 N4'
_chemical_formula_sum
 'C30 H16 Cu N6 O2'
_chemical_formula_weight          556.03
 
loop_
 _atom_type_symbol
 _atom_type_description
 _atom_type_scat_dispersion_real
 _atom_type_scat_dispersion_imag
 _atom_type_scat_source
 'C'  'C'   0.0033   0.0016
 'International Tables Vol C Tables 4.2.6.8 and 6.1.1.4'
 'H'  'H'   0.0000   0.0000
 'International Tables Vol C Tables 4.2.6.8 and 6.1.1.4'
 'N'  'N'   0.0061   0.0033
 'International Tables Vol C Tables 4.2.6.8 and 6.1.1.4'
 'O'  'O'   0.0106   0.0060
 'International Tables Vol C Tables 4.2.6.8 and 6.1.1.4'
 'Cu'  'Cu'   0.3201   1.2651
 'International Tables Vol C Tables 4.2.6.8 and 6.1.1.4'
 
_symmetry_cell_setting           'Triclinic'
_symmetry_space_group_name_H-M   'P-1   '
_symmetry_space_group_name_Hall   '-P 1   '
 
loop_
 _symmetry_equiv_pos_as_xyz
 'x, y, z'
 '-x, -y, -z'
 
_cell_length_a                    7.123(5)
_cell_length_b                    7.543(5)
_cell_length_c                    12.009(5)
_cell_angle_alpha                 83.508(5)
_cell_angle_beta                  88.837(5)
_cell_angle_gamma                 67.752(5)
_cell_volume                      593.2(6)
_cell_formula_units_Z             1
_cell_measurement_temperature     225(2)
_cell_measurement_reflns_used    2301
_cell_measurement_theta_min        2.94
_cell_measurement_theta_max       26.11
 
_exptl_crystal_description       'plate'
_exptl_crystal_colour            'black'
_exptl_crystal_size_max           0.50
_exptl_crystal_size_mid           0.33
_exptl_crystal_size_min           0.04
_exptl_crystal_density_meas       ?
_exptl_crystal_density_diffrn     1.557
_exptl_crystal_density_method     'not measured'
_exptl_crystal_F_000              283
_exptl_absorpt_coefficient_mu     0.964
_exptl_absorpt_correction_type    'multi-scan'
_exptl_absorpt_correction_T_min   0.6443
_exptl_absorpt_correction_T_max   0.9625
_exptl_absorpt_process_details     'APEX2 Software Suite (Bruker,2009)' 
 
_exptl_special_details
;
 ?
;
 
_diffrn_ambient_temperature       225(2)
_diffrn_radiation_wavelength      0.71073
_diffrn_radiation_type            MoK\a
_diffrn_radiation_source          'fine-focus sealed tube'
_diffrn_radiation_monochromator   graphite
_diffrn_measurement_device_type  'Bruker APEX-II CCD'
_diffrn_measurement_method       '\f and \w scans'
_diffrn_detector_area_resol_mean  ?
_diffrn_standards_number          ?
_diffrn_standards_interval_count  ?
_diffrn_standards_interval_time   ?
_diffrn_standards_decay_%         ?
_diffrn_reflns_number             6137
_diffrn_reflns_av_R_equivalents   0.0487
_diffrn_reflns_av_sigmaI/netI     0.0561
_diffrn_reflns_limit_h_min        -8
_diffrn_reflns_limit_h_max        8
_diffrn_reflns_limit_k_min        -9
_diffrn_reflns_limit_k_max        9
_diffrn_reflns_limit_l_min        -14
_diffrn_reflns_limit_l_max        14
_diffrn_reflns_theta_min          1.71
_diffrn_reflns_theta_max          26.28
_reflns_number_total              2384
_reflns_number_gt                 1970
_reflns_threshold_expression      >2sigma(I)
 
_computing_data_collection      'Bruker APEX2'
_computing_cell_refinement      'Bruker SAINT'
_computing_data_reduction       'Bruker SAINT'  
_computing_structure_solution   'SHELXS-97 (Sheldrick, 2008)'
_computing_structure_refinement 'SHELXL-97 (Sheldrick, 2008)'
_computing_molecular_graphics   'Bruker SHELXTL'
_computing_publication_material 'Bruker SHELXTL'
 
_refine_special_details
;
 Refinement of F^2^ against ALL reflections.  The weighted R-factor wR and
 goodness of fit S are based on F^2^, conventional R-factors R are based
 on F, with F set to zero for negative F^2^. The threshold expression of
 F^2^ > 2sigma(F^2^) is used only for calculating R-factors(gt) etc. and is
 not relevant to the choice of reflections for refinement.  R-factors based
 on F^2^ are statistically about twice as large as those based on F, and R-
 factors based on ALL data will be even larger.
;
 
_refine_ls_structure_factor_coef  Fsqd
_refine_ls_matrix_type            full
_refine_ls_weighting_scheme       calc
_refine_ls_weighting_details
 'calc w=1/[\s^2^(Fo^2^)+(0.1058P)^2^+0.0000P] where P=(Fo^2^+2Fc^2^)/3'
_atom_sites_solution_primary      direct
_atom_sites_solution_secondary    difmap
_atom_sites_solution_hydrogens    geom
_refine_ls_hydrogen_treatment     constr
_refine_ls_extinction_method      none
_refine_ls_extinction_coef        ?
_refine_ls_number_reflns          2384
_refine_ls_number_parameters      178
_refine_ls_number_restraints      0
_refine_ls_R_factor_all           0.0681
_refine_ls_R_factor_gt            0.0547
_refine_ls_wR_factor_ref          0.1555
_refine_ls_wR_factor_gt           0.1464
_refine_ls_goodness_of_fit_ref    1.029
_refine_ls_restrained_S_all       1.029
_refine_ls_shift/su_max           0.000
_refine_ls_shift/su_mean          0.000
 
loop_
 _atom_site_label
 _atom_site_type_symbol
 _atom_site_fract_x
 _atom_site_fract_y
 _atom_site_fract_z
 _atom_site_U_iso_or_equiv
 _atom_site_adp_type
 _atom_site_occupancy
 _atom_site_symmetry_multiplicity
 _atom_site_calc_flag
 _atom_site_refinement_flags
 _atom_site_disorder_assembly
 _atom_site_disorder_group
Cu1 Cu 1.0000 0.0000 1.0000 0.0371(3) Uani 1 2 d S . .
O1 O 1.0192(4) -0.2331(3) 0.9404(2) 0.0444(6) Uani 1 1 d . . .
N1 N 0.7267(4) 0.1053(4) 0.9332(2) 0.0323(6) Uani 1 1 d . . .
C5 C 0.4976(5) 0.0104(5) 0.8301(3) 0.0348(7) Uani 1 1 d . . .
C6 C 0.6863(5) -0.0296(4) 0.8836(3) 0.0313(7) Uani 1 1 d . . .
C1 C 0.8505(5) -0.2140(5) 0.8890(3) 0.0346(7) Uani 1 1 d . . .
C7 C 0.5868(5) 0.2809(4) 0.9319(3) 0.0353(7) Uani 1 1 d . . .
H7 H 0.6160 0.3723 0.9662 0.042 Uiso 1 1 calc R . .
C9 C 0.3523(5) 0.1999(5) 0.8299(3) 0.0411(8) Uani 1 1 d . . .
H9 H 0.2260 0.2340 0.7953 0.049 Uiso 1 1 calc R . .
C3 C 0.6284(6) -0.3172(5) 0.7863(3) 0.0410(8) Uani 1 1 d . . .
H3 H 0.6091 -0.4154 0.7538 0.049 Uiso 1 1 calc R . .
C15 C 0.4834(5) -0.1533(5) 0.4496(3) 0.0402(8) Uani 1 1 d . . .
H15 H 0.4704 -0.2528 0.4153 0.048 Uiso 1 1 calc R . .
N2 N 1.1790(6) -0.3763(5) 0.6116(3) 0.0651(10) Uani 1 1 d . . .
C14 C 0.6572(5) -0.1830(5) 0.5042(3) 0.0418(8) Uani 1 1 d . . .
H14 H 0.7621 -0.3035 0.5084 0.050 Uiso 1 1 calc R . .
C12 C 0.8644(5) -0.0595(5) 0.6083(3) 0.0422(8) Uani 1 1 d . . .
C11 C 0.8955(5) 0.0913(6) 0.6584(3) 0.0454(9) Uani 1 1 d . . .
C13 C 0.6836(5) -0.0311(5) 0.5564(3) 0.0387(8) Uani 1 1 d . . .
N3 N 0.9218(6) 0.2131(6) 0.6952(3) 0.0655(10) Uani 1 1 d . . .
C2 C 0.8169(5) -0.3565(5) 0.8391(3) 0.0408(8) Uani 1 1 d . . .
H2 H 0.9190 -0.4784 0.8405 0.049 Uiso 1 1 calc R . .
C10 C 1.0381(6) -0.2392(6) 0.6117(3) 0.0471(9) Uani 1 1 d . . .
C8 C 0.3963(5) 0.3335(5) 0.8805(3) 0.0425(8) Uani 1 1 d . . .
H8 H 0.3004 0.4581 0.8807 0.051 Uiso 1 1 calc R . .
C4 C 0.4728(5) -0.1413(5) 0.7808(3) 0.0393(8) Uani 1 1 d . . .
H4 H 0.3509 -0.1213 0.7448 0.047 Uiso 1 1 calc R . .
 
loop_
 _atom_site_aniso_label
 _atom_site_aniso_U_11
 _atom_site_aniso_U_22
 _atom_site_aniso_U_33
 _atom_site_aniso_U_23
 _atom_site_aniso_U_13
 _atom_site_aniso_U_12
Cu1 0.0263(3) 0.0240(3) 0.0559(4) -0.0170(2) -0.0079(2) 0.0003(2)
O1 0.0271(12) 0.0281(12) 0.0706(16) -0.0178(11) -0.0144(11) 0.0021(10)
N1 0.0282(14) 0.0243(13) 0.0416(14) -0.0130(11) -0.0025(11) -0.0041(11)
C5 0.0310(17) 0.0318(17) 0.0407(17) -0.0098(13) -0.0004(13) -0.0093(14)
C6 0.0251(15) 0.0255(16) 0.0412(17) -0.0113(12) -0.0001(13) -0.0050(13)
C1 0.0303(17) 0.0227(15) 0.0466(18) -0.0114(13) 0.0032(14) -0.0035(13)
C7 0.0329(17) 0.0230(15) 0.0473(18) -0.0147(13) -0.0033(14) -0.0045(13)
C9 0.0252(16) 0.0384(19) 0.055(2) -0.0143(15) -0.0068(14) -0.0040(15)
C3 0.046(2) 0.0324(18) 0.0501(19) -0.0183(15) 0.0004(16) -0.0167(16)
C15 0.0366(19) 0.0348(18) 0.0495(19) -0.0187(15) -0.0029(15) -0.0099(15)
N2 0.047(2) 0.058(2) 0.079(2) -0.0153(19) -0.0068(18) -0.0041(19)
C14 0.0356(19) 0.0332(18) 0.051(2) -0.0157(15) 0.0005(15) -0.0038(15)
C12 0.0332(18) 0.041(2) 0.051(2) -0.0134(15) -0.0019(15) -0.0100(16)
C11 0.0309(18) 0.052(2) 0.053(2) -0.0167(17) -0.0020(15) -0.0123(17)
C13 0.0321(18) 0.0396(19) 0.0426(18) -0.0137(14) 0.0033(14) -0.0090(15)
N3 0.051(2) 0.069(3) 0.086(3) -0.031(2) -0.0072(19) -0.028(2)
C2 0.0369(19) 0.0235(16) 0.059(2) -0.0171(14) -0.0006(16) -0.0045(14)
C10 0.034(2) 0.050(2) 0.055(2) -0.0134(17) -0.0067(16) -0.0105(18)
C8 0.0291(17) 0.0262(17) 0.063(2) -0.0183(15) -0.0043(15) 0.0034(14)
C4 0.0292(17) 0.0416(19) 0.0510(19) -0.0171(15) -0.0030(14) -0.0142(15)
 
_geom_special_details
;
 All esds (except the esd in the dihedral angle between two l.s. planes)
 are estimated using the full covariance matrix.  The cell esds are taken
 into account individually in the estimation of esds in distances, angles
 and torsion angles; correlations between esds in cell parameters are only
 used when they are defined by crystal symmetry.  An approximate (isotropic)
 treatment of cell esds is used for estimating esds involving l.s. planes.
;
 
loop_
 _geom_bond_atom_site_label_1
 _geom_bond_atom_site_label_2
 _geom_bond_distance
 _geom_bond_site_symmetry_2
 _geom_bond_publ_flag
Cu1 O1 1.929(2) . ?
Cu1 O1 1.929(2) 2_757 ?
Cu1 N1 1.953(3) . ?
Cu1 N1 1.953(3) 2_757 ?
O1 C1 1.313(4) . ?
N1 C7 1.321(4) . ?
N1 C6 1.355(4) . ?
C5 C9 1.412(5) . ?
C5 C6 1.412(5) . ?
C5 C4 1.415(5) . ?
C6 C1 1.434(4) . ?
C1 C2 1.385(4) . ?
C7 C8 1.397(5) . ?
C9 C8 1.366(5) . ?
C3 C4 1.364(5) . ?
C3 C2 1.408(5) . ?
C15 C14 1.343(5) . ?
C15 C13 1.443(5) 2_656 ?
N2 C10 1.136(5) . ?
C14 C13 1.439(5) . ?
C12 C13 1.373(5) . ?
C12 C11 1.434(5) . ?
C12 C10 1.445(5) . ?
C11 N3 1.141(5) . ?
C13 C15 1.443(5) 2_656 ?
 
loop_
 _geom_angle_atom_site_label_1
 _geom_angle_atom_site_label_2
 _geom_angle_atom_site_label_3
 _geom_angle
 _geom_angle_site_symmetry_1
 _geom_angle_site_symmetry_3
 _geom_angle_publ_flag
O1 Cu1 O1 180.0 . 2_757 ?
O1 Cu1 N1 84.36(10) . . ?
O1 Cu1 N1 95.64(10) 2_757 . ?
O1 Cu1 N1 95.64(10) . 2_757 ?
O1 Cu1 N1 84.36(10) 2_757 2_757 ?
N1 Cu1 N1 180.00(14) . 2_757 ?
C1 O1 Cu1 112.23(19) . . ?
C7 N1 C6 119.7(3) . . ?
C7 N1 Cu1 129.0(2) . . ?
C6 N1 Cu1 111.3(2) . . ?
C9 C5 C6 116.5(3) . . ?
C9 C5 C4 126.3(3) . . ?
C6 C5 C4 117.3(3) . . ?
N1 C6 C5 122.2(3) . . ?
N1 C6 C1 114.7(3) . . ?
C5 C6 C1 123.1(3) . . ?
O1 C1 C2 125.7(3) . . ?
O1 C1 C6 117.4(3) . . ?
C2 C1 C6 116.9(3) . . ?
N1 C7 C8 122.0(3) . . ?
C8 C9 C5 120.3(3) . . ?
C4 C3 C2 122.9(3) . . ?
C14 C15 C13 120.8(3) . 2_656 ?
C15 C14 C13 121.0(3) . . ?
C13 C12 C11 121.8(3) . . ?
C13 C12 C10 122.6(3) . . ?
C11 C12 C10 115.6(3) . . ?
N3 C11 C12 178.0(4) . . ?
C12 C13 C14 120.9(3) . . ?
C12 C13 C15 120.9(3) . 2_656 ?
C14 C13 C15 118.2(3) . 2_656 ?
C1 C2 C3 120.1(3) . . ?
N2 C10 C12 177.0(5) . . ?
C9 C8 C7 119.3(3) . . ?
C3 C4 C5 119.8(3) . . ?
 
_diffrn_measured_fraction_theta_max    0.990
_diffrn_reflns_theta_full              26.28
_diffrn_measured_fraction_theta_full   0.990
_refine_diff_density_max    0.955
_refine_diff_density_min   -0.977
_refine_diff_density_rms    0.108
#===END
